# Supplementary figures and images for: Structure transformations and ionic conductivity in germanides of sodium and potassium
Source: Royal Society of Chemistry journal article supplement (doi:10.1039/d5ta01128k), 2025-01-01

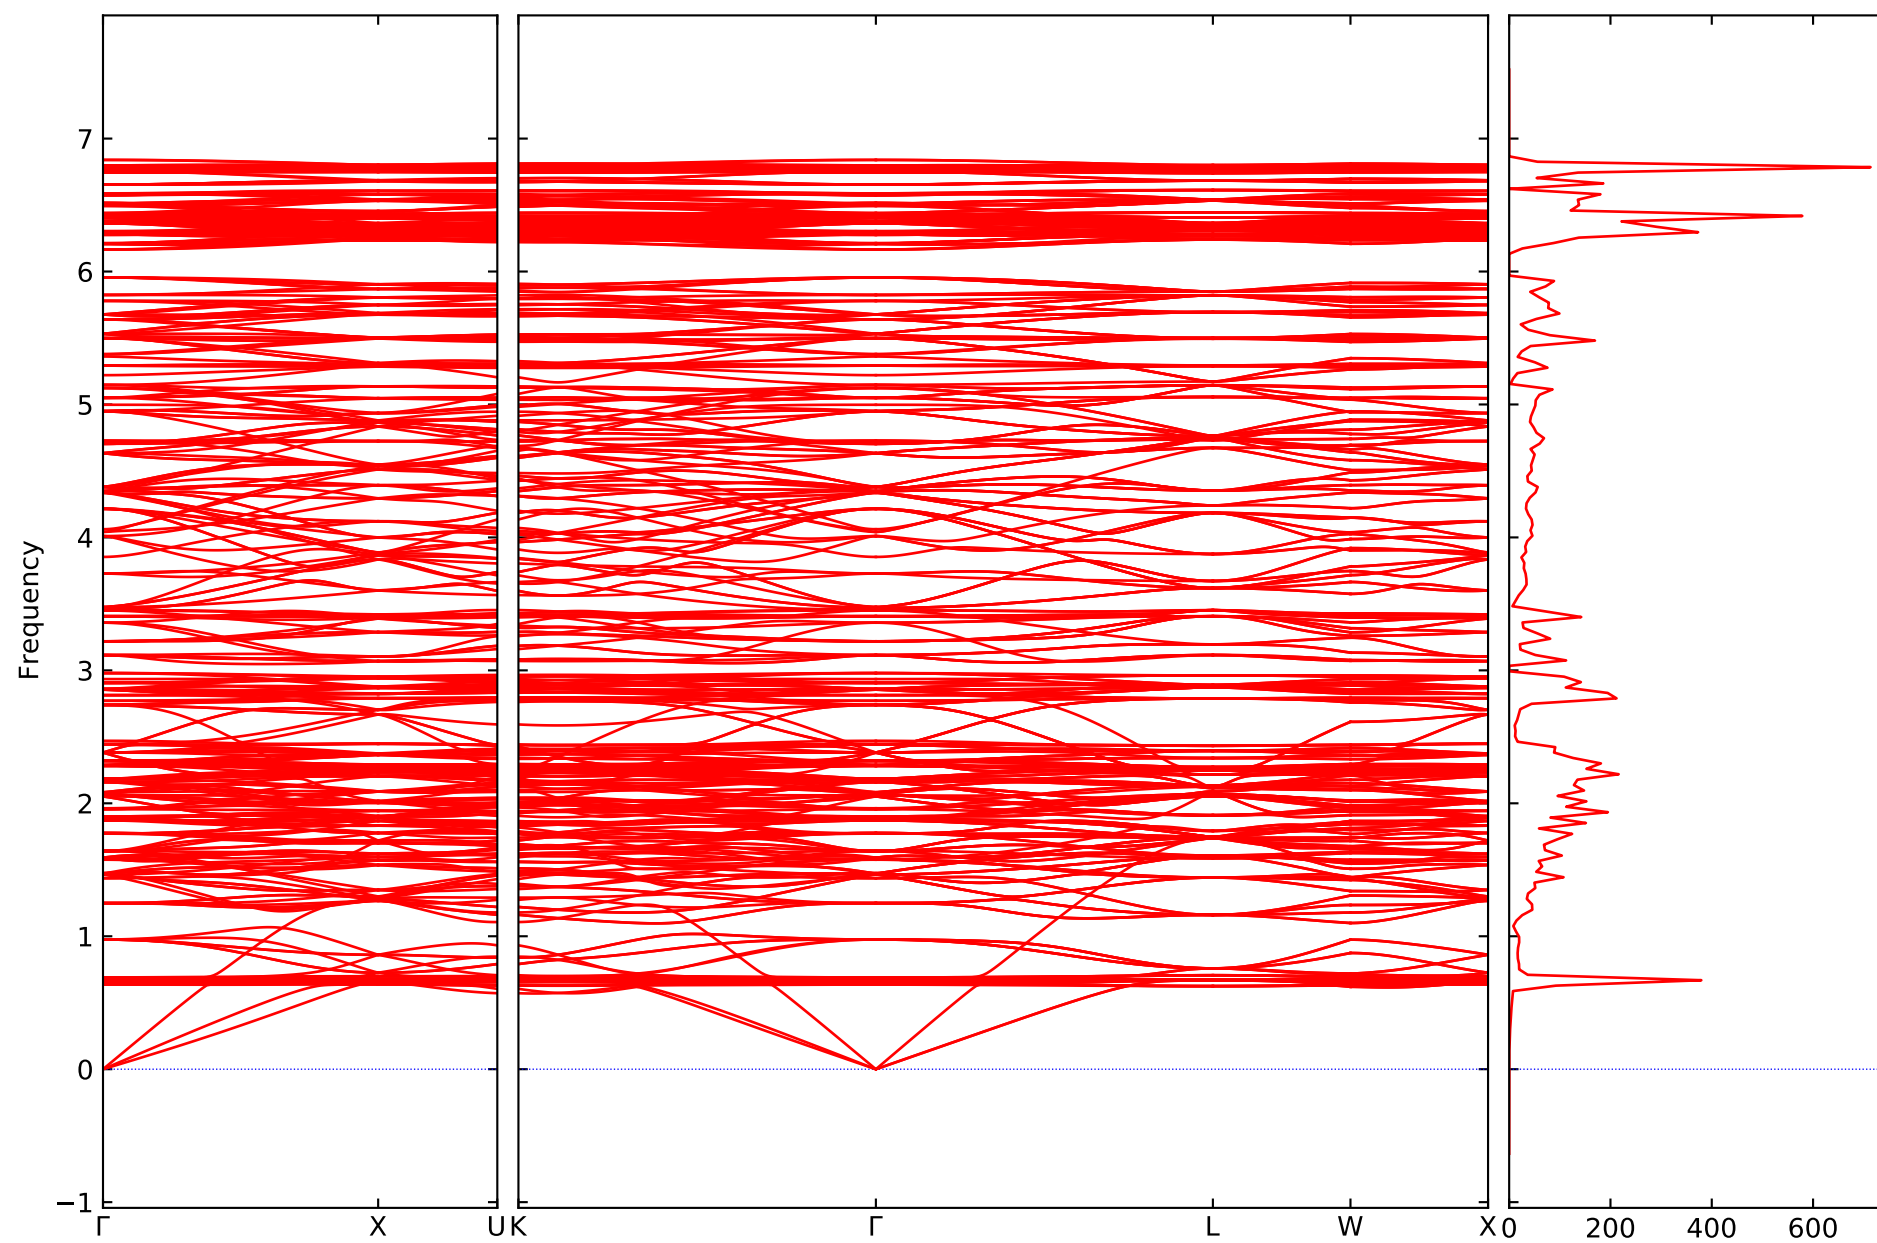

Supplement: d5ta01128k1.zip [file ph.pdf › SI/KGe/Structures/K3Ge17/ph.pdf]

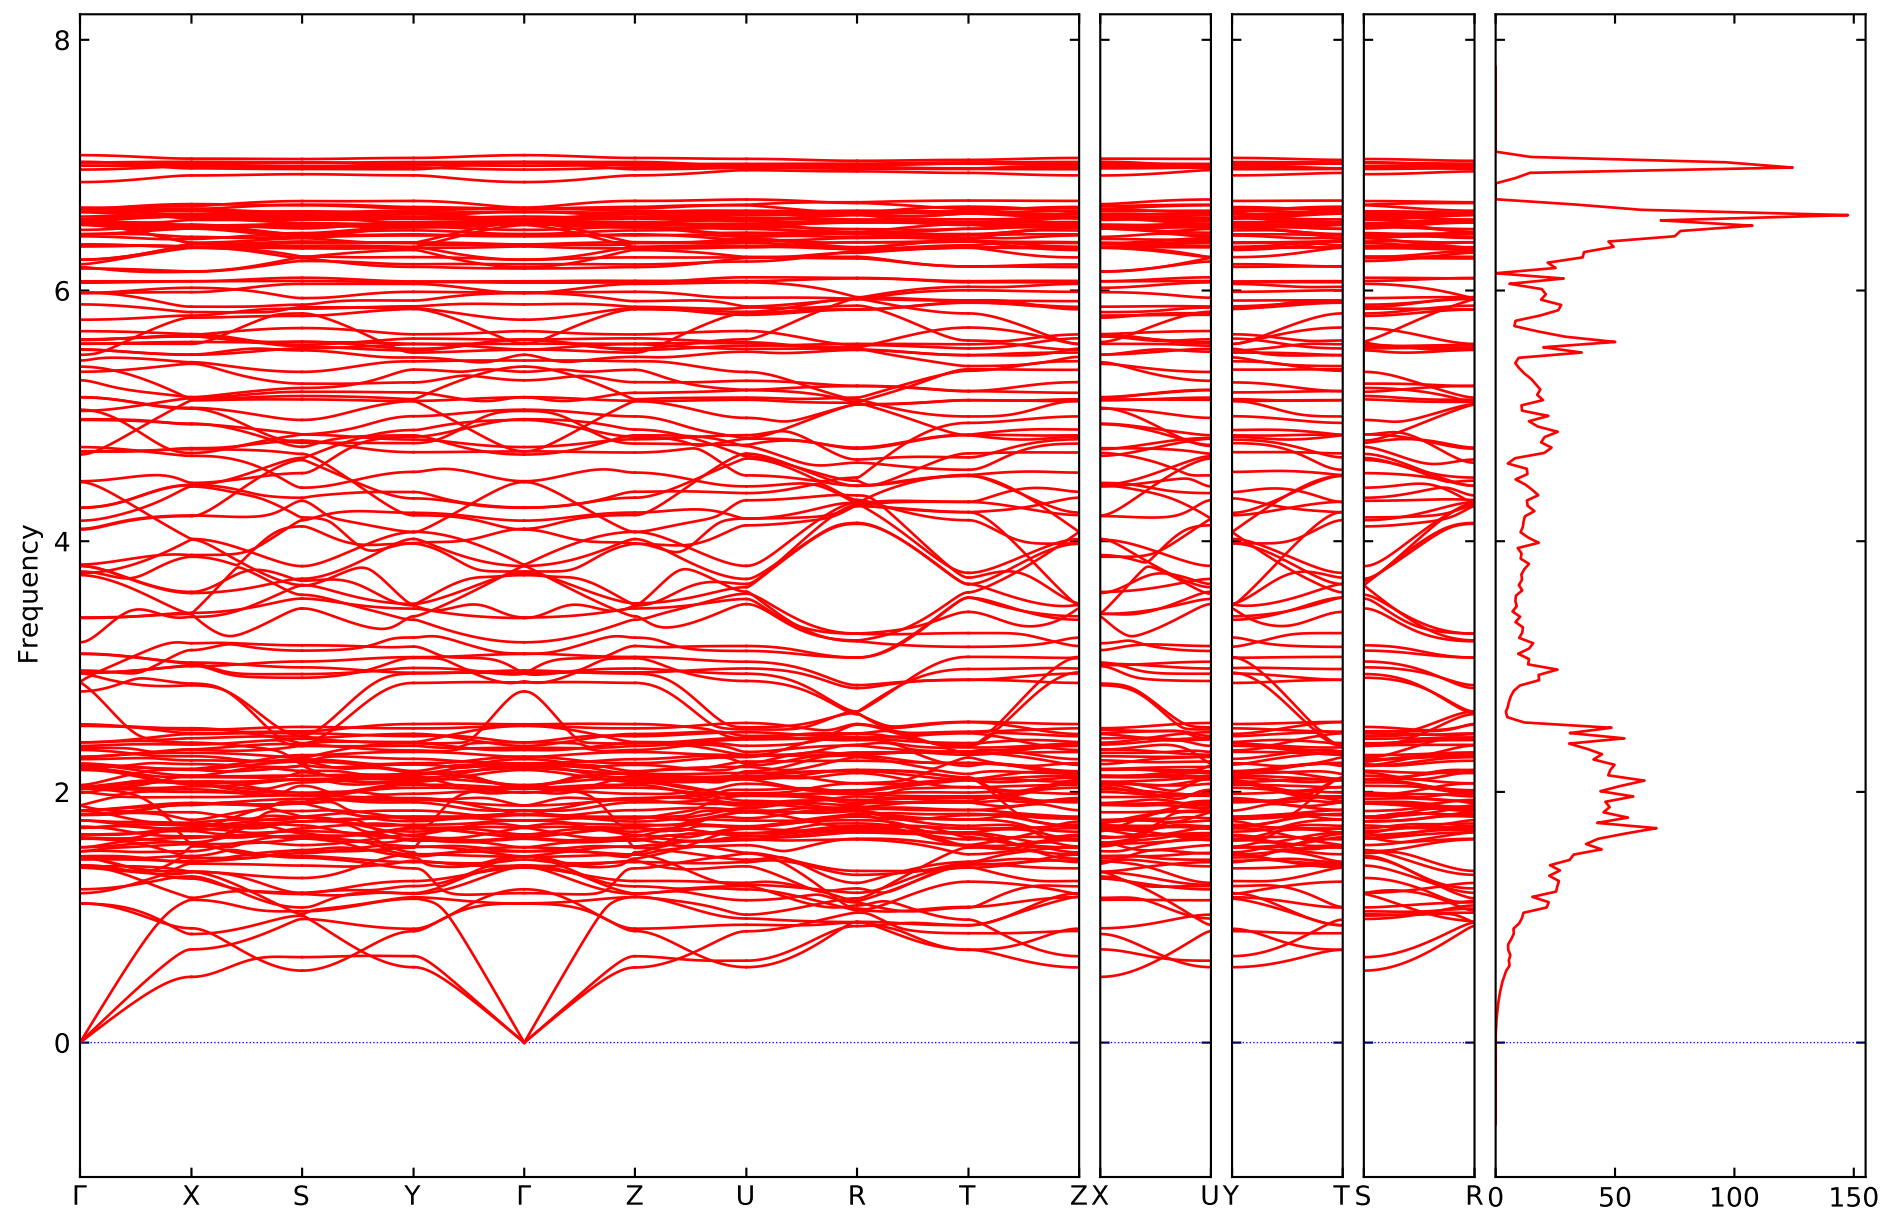

Supplement: d5ta01128k1.zip [file ph.pdf › SI/KGe/Structures/K4Ge23/ph.pdf]

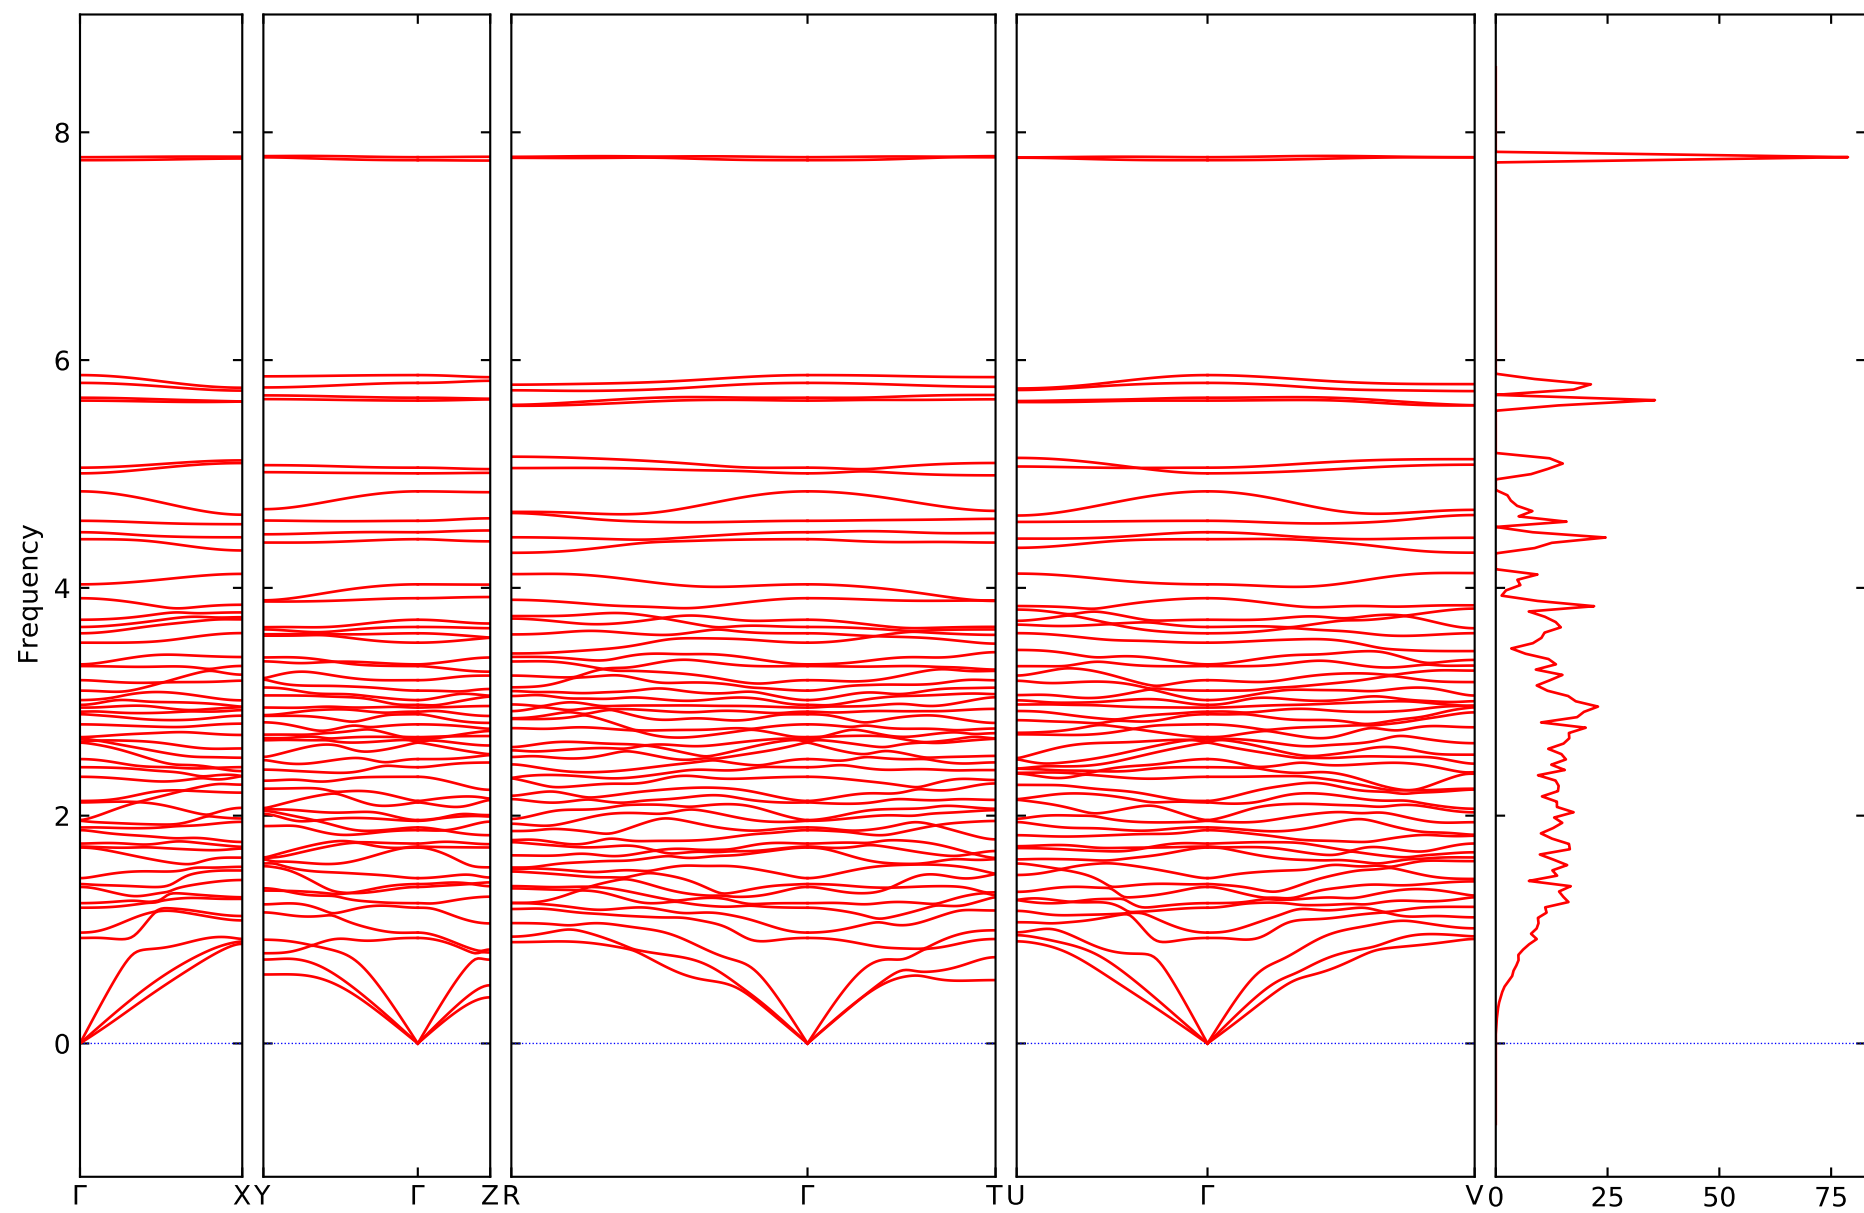

Supplement: d5ta01128k1.zip [file ph.pdf › SI/KGe/Structures/K5Ge4_EA11059/ph.pdf]

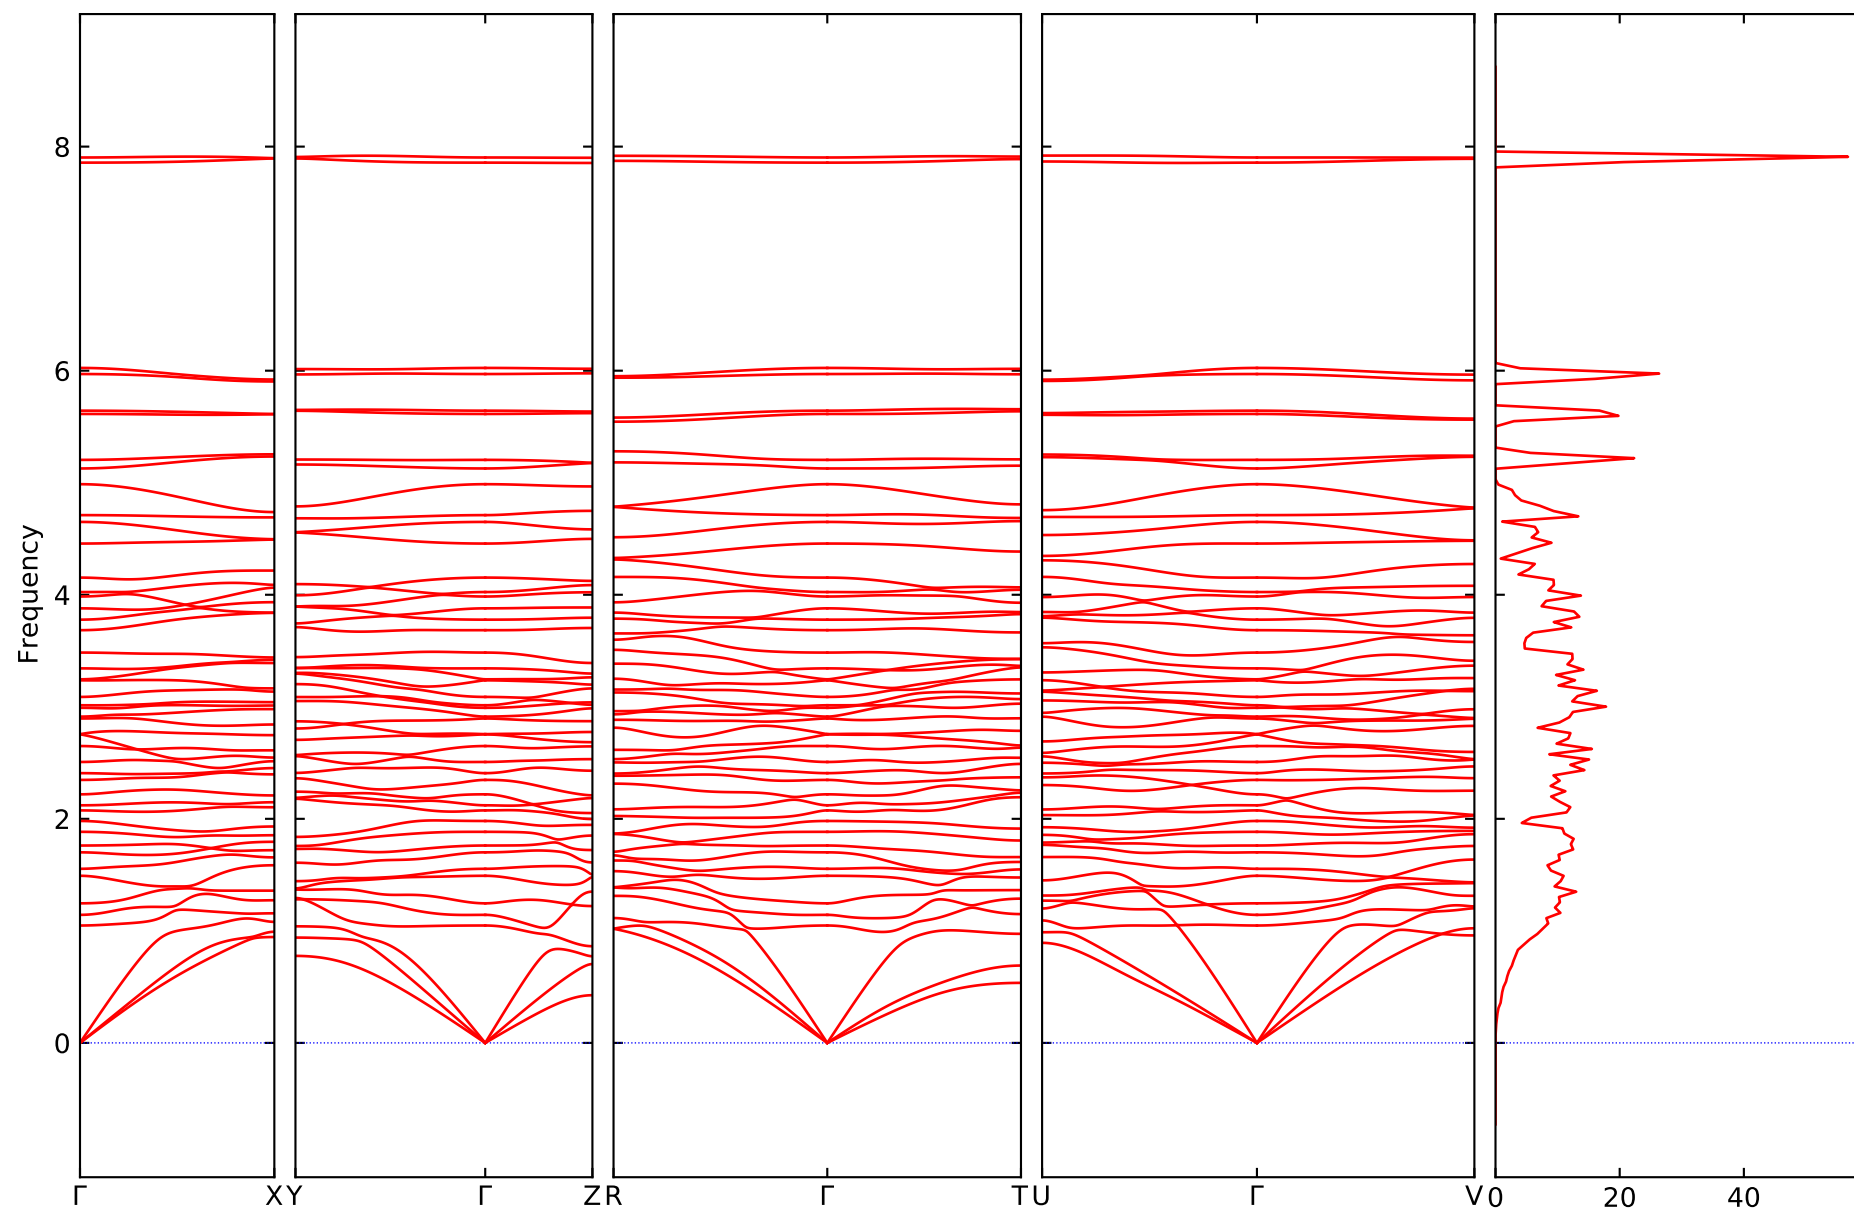

Supplement: d5ta01128k1.zip [file ph.pdf › SI/KGe/Structures/KGe_6114/ph.pdf]

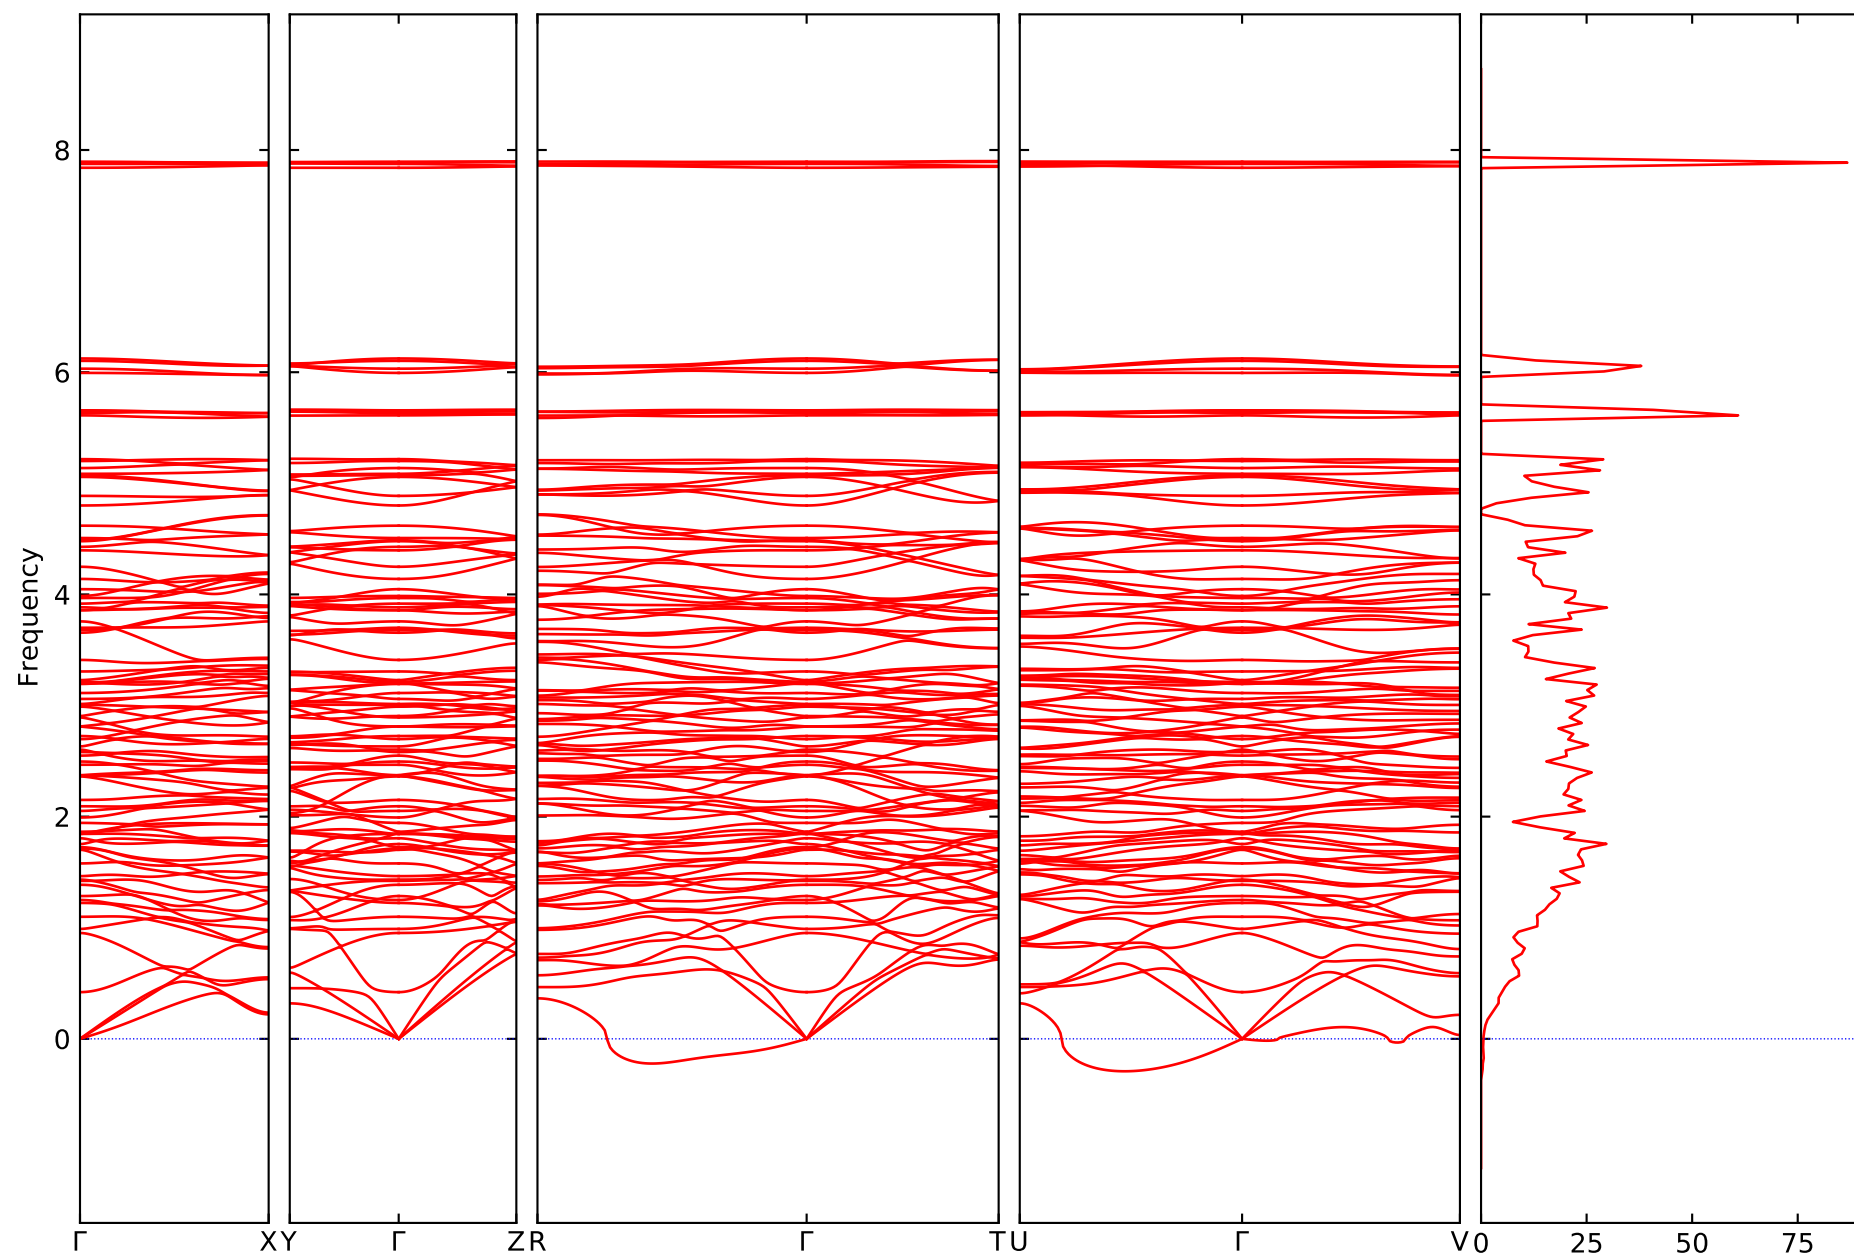

Supplement: d5ta01128k1.zip [file ph.pdf › SI/KGe/Structures/KGe_EA432/ph.pdf]

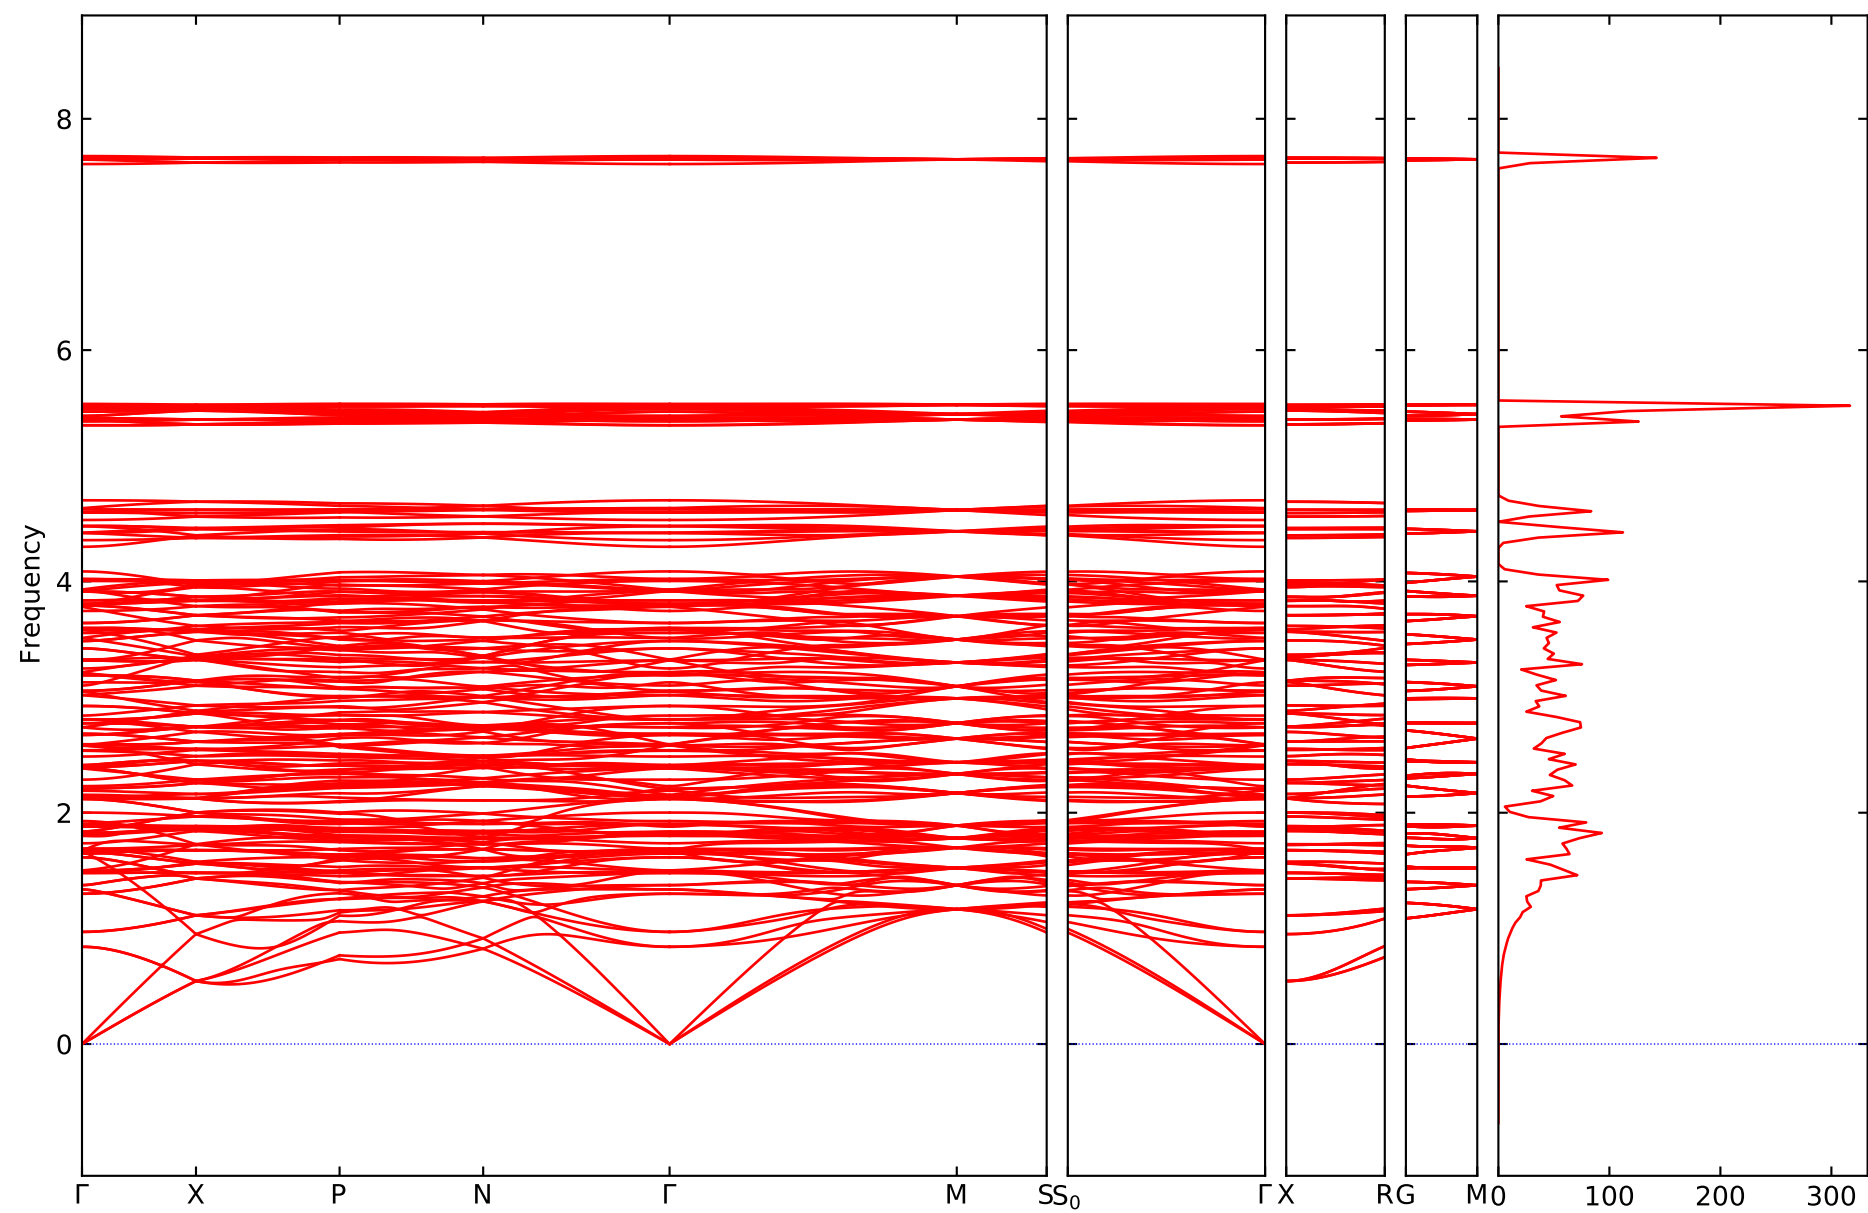

Supplement: d5ta01128k1.zip [file ph.pdf › SI/KGe/Structures/KGe_I41acd/ph.pdf]

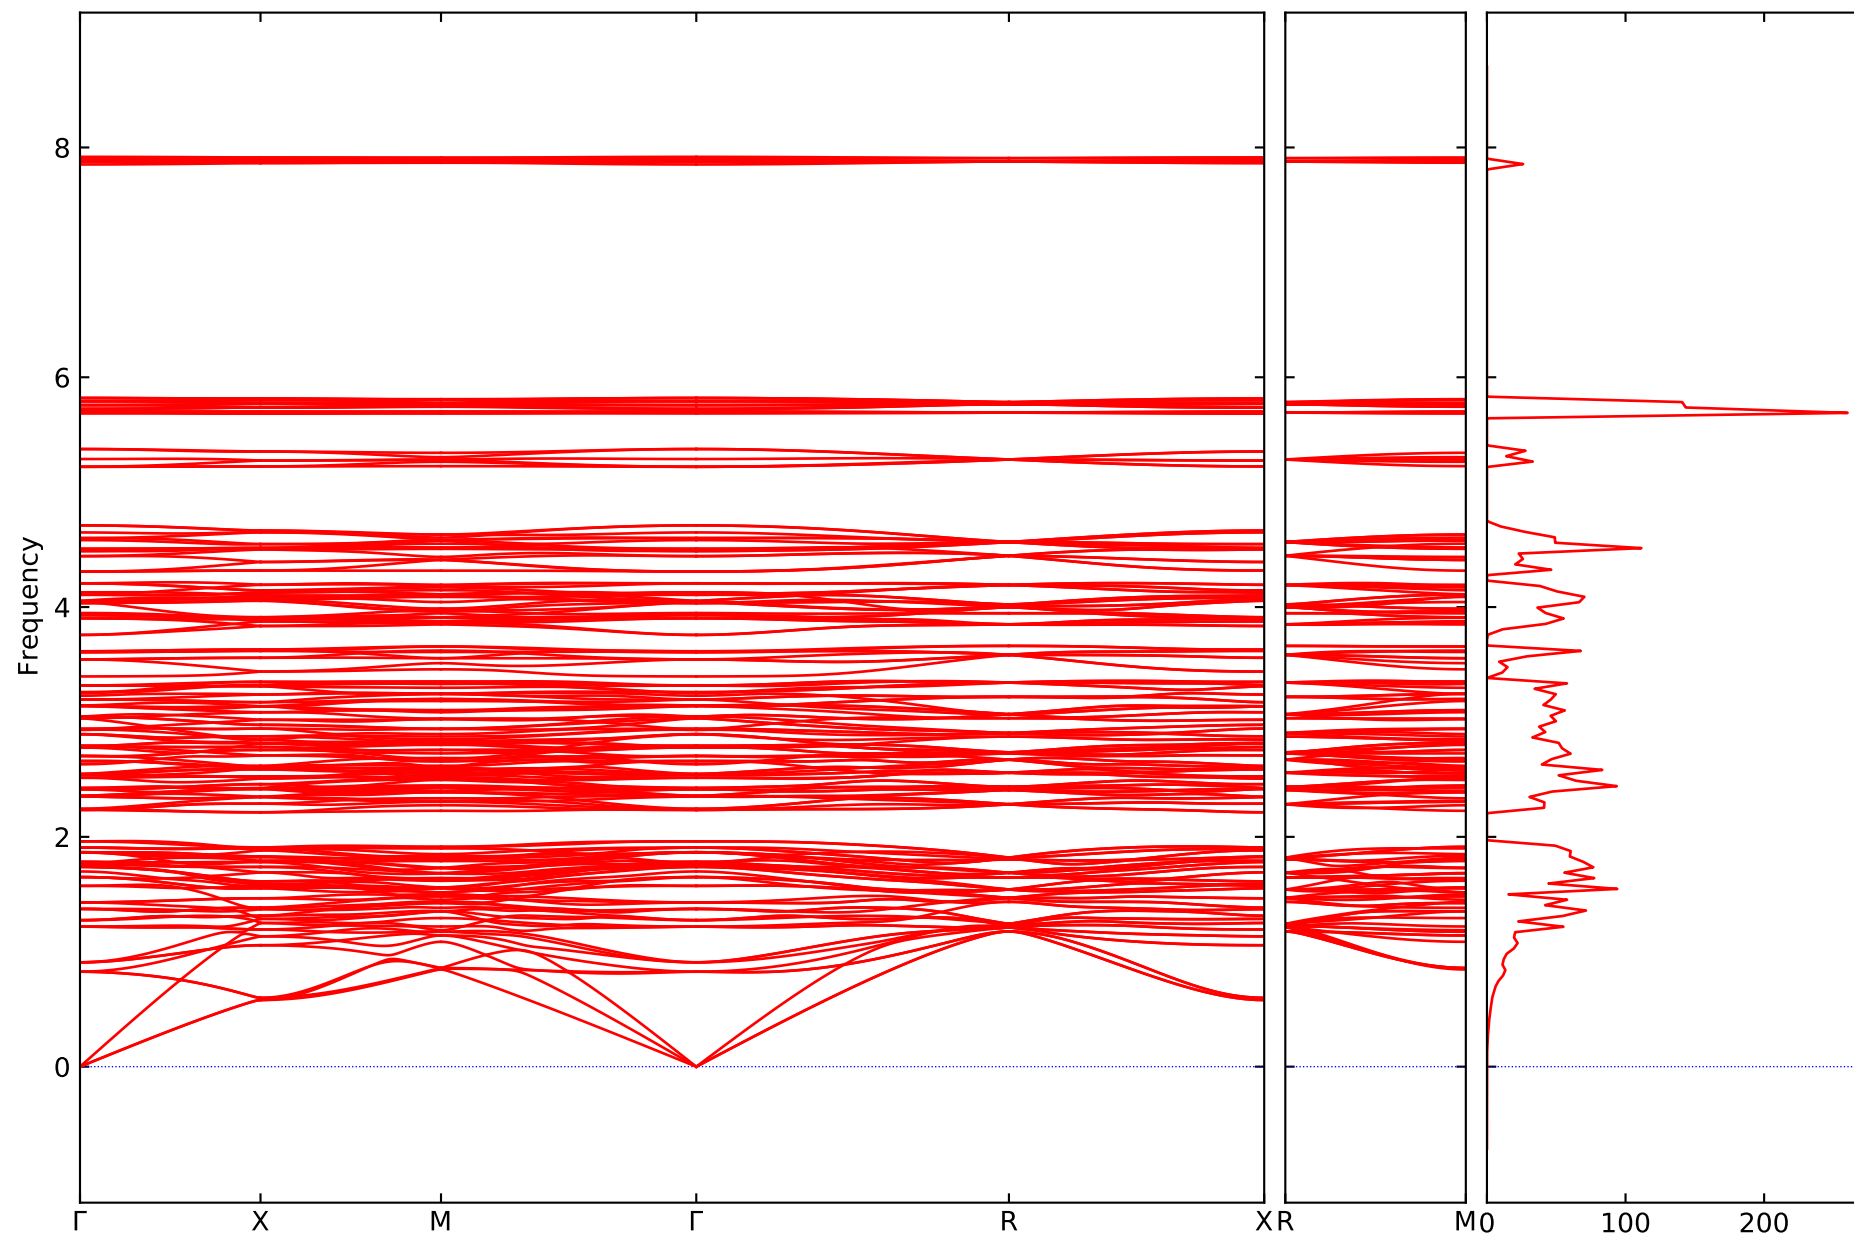

Supplement: d5ta01128k1.zip [file ph.pdf › SI/KGe/Structures/KGe_P43n/ph.pdf]

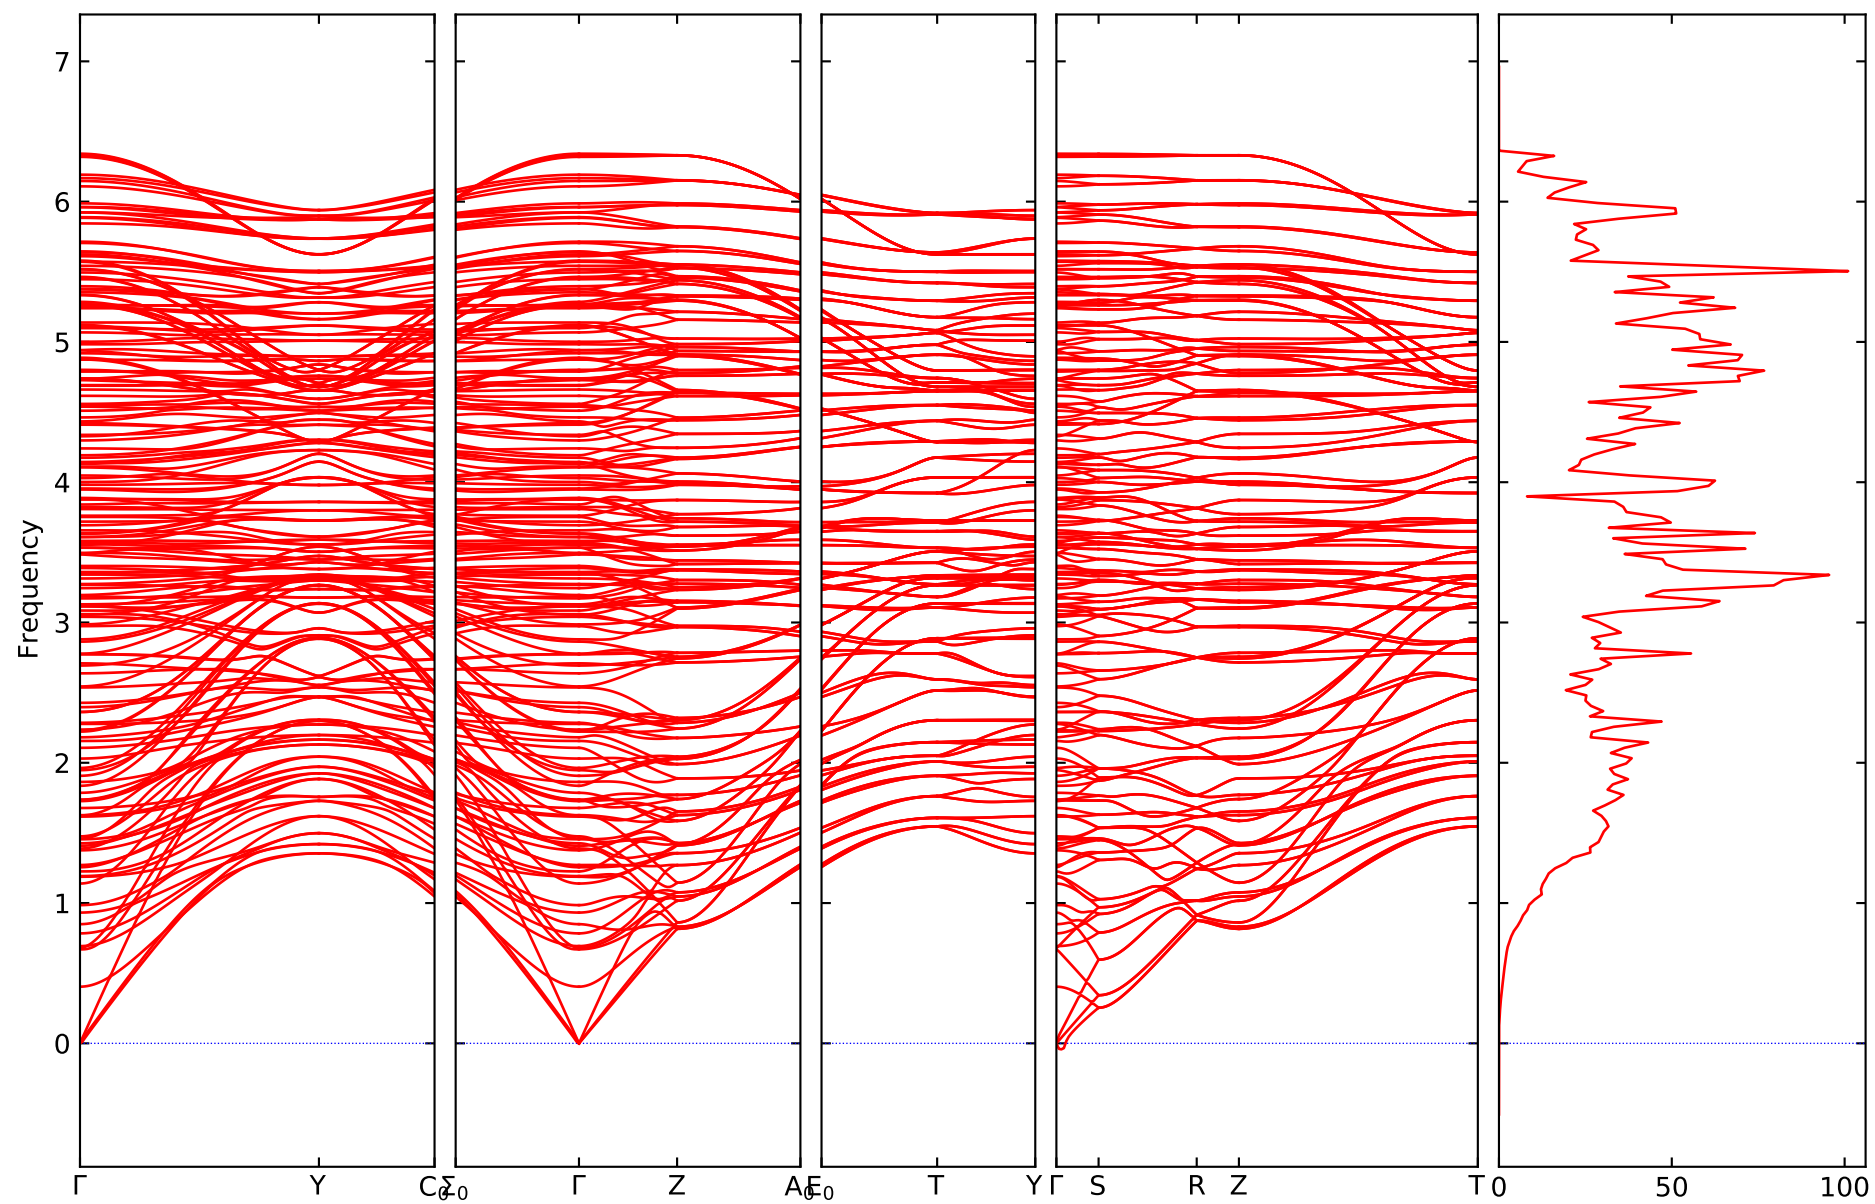

Supplement: d5ta01128k1.zip [file ph.pdf › SI/NaGe/Structures/Na11Ge6/ph.pdf]

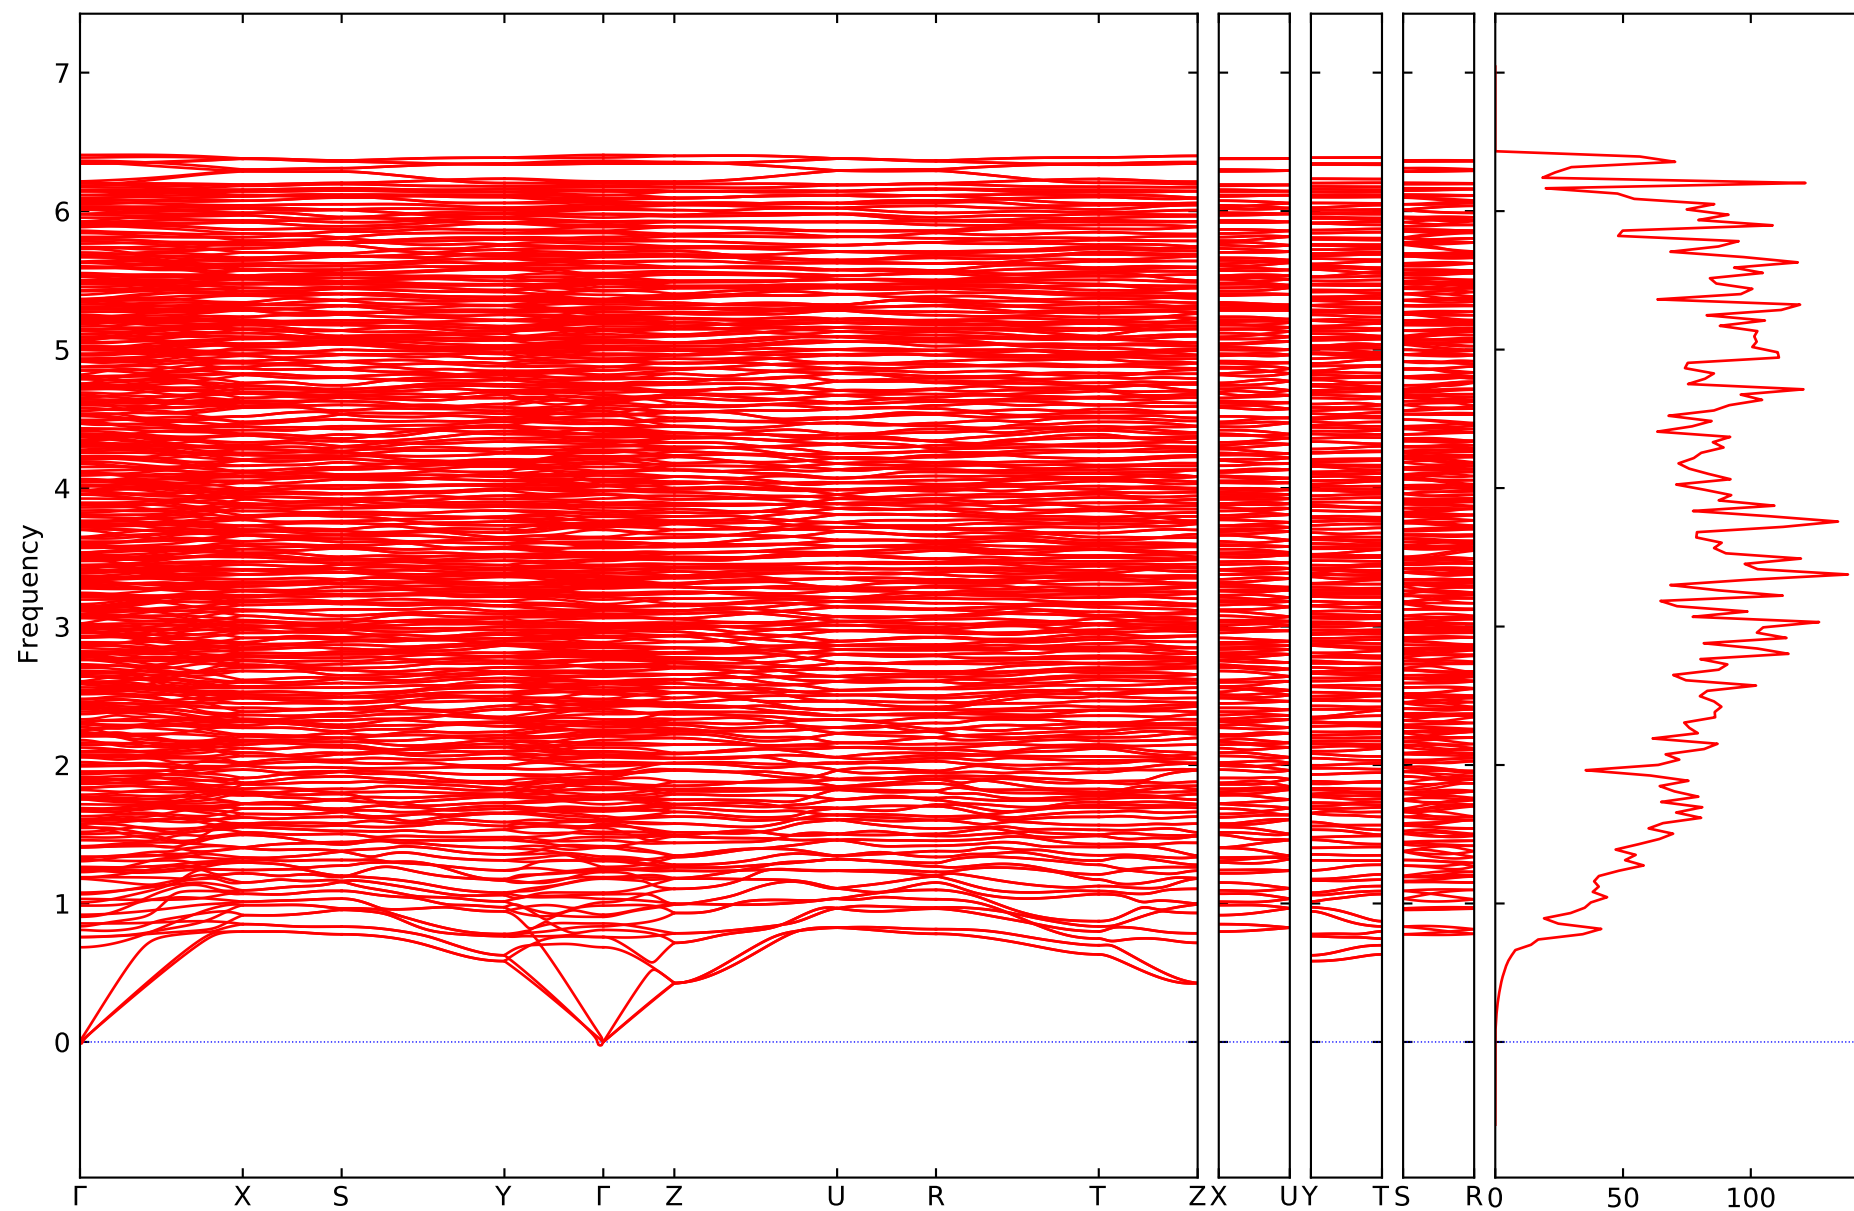

Supplement: d5ta01128k1.zip [file ph.pdf › SI/NaGe/Structures/Na12Ge7/ph.pdf]

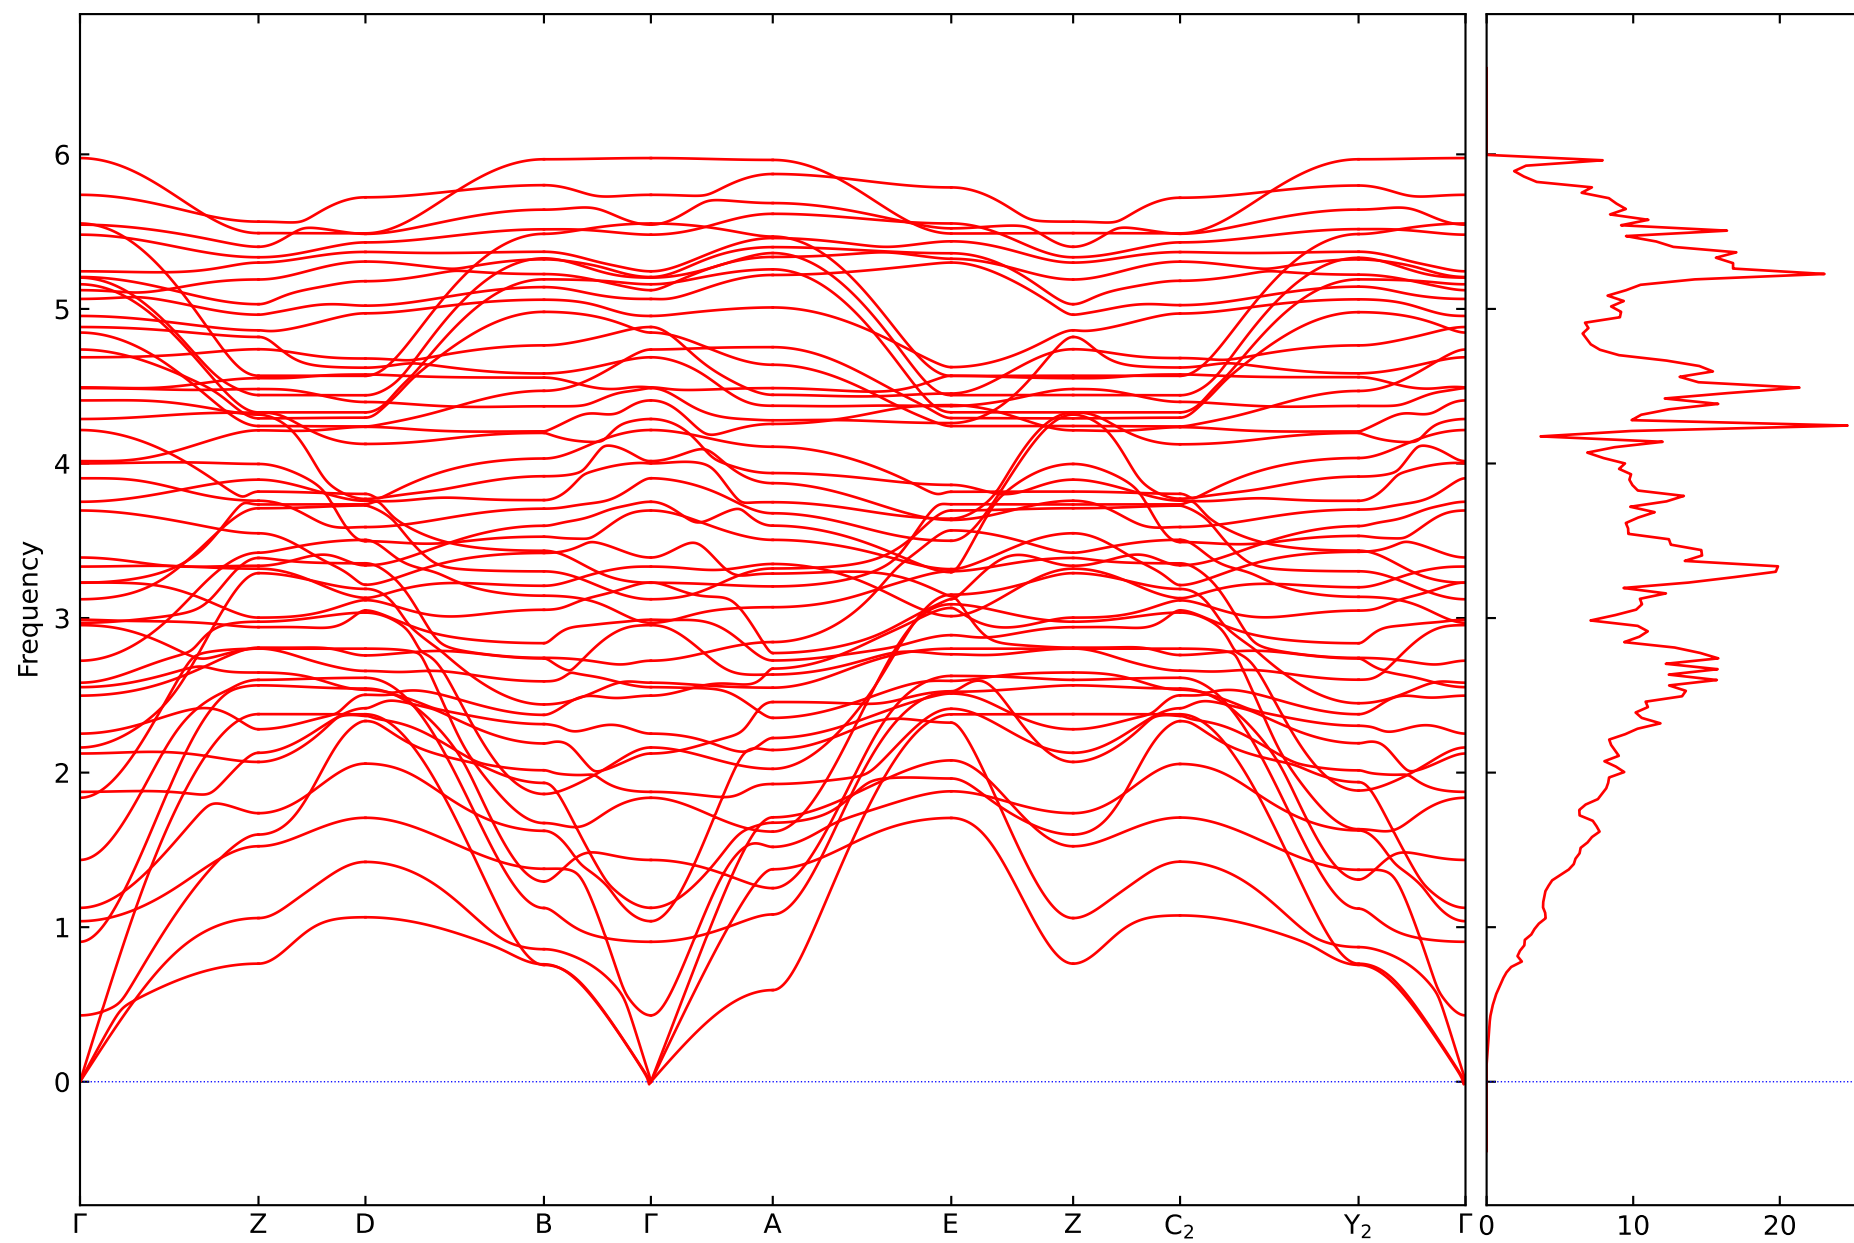

Supplement: d5ta01128k1.zip [file ph.pdf › SI/NaGe/Structures/Na13Ge4_EA6486/ph.pdf]

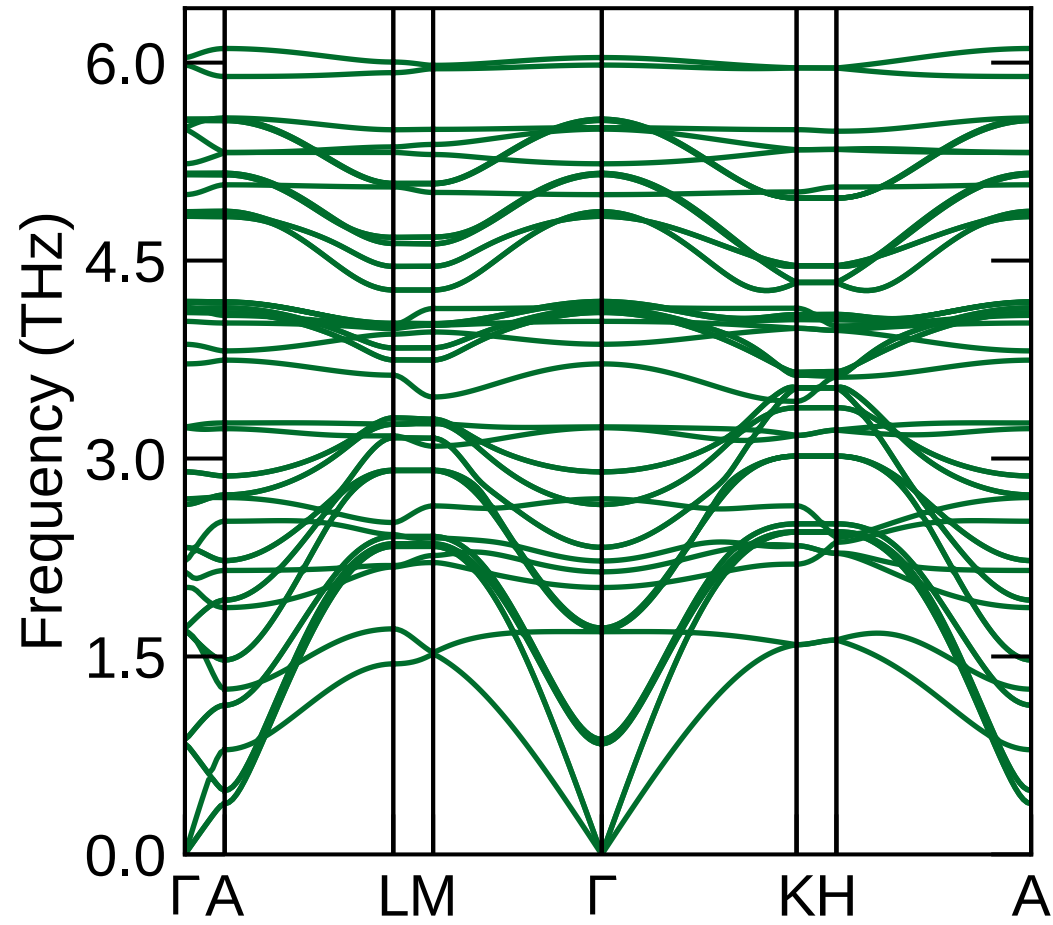

Supplement: d5ta01128k1.zip [file ph.pdf › SI/NaGe/Structures/Na13Ge5_Li13Si5_OQMD/ph.pdf]

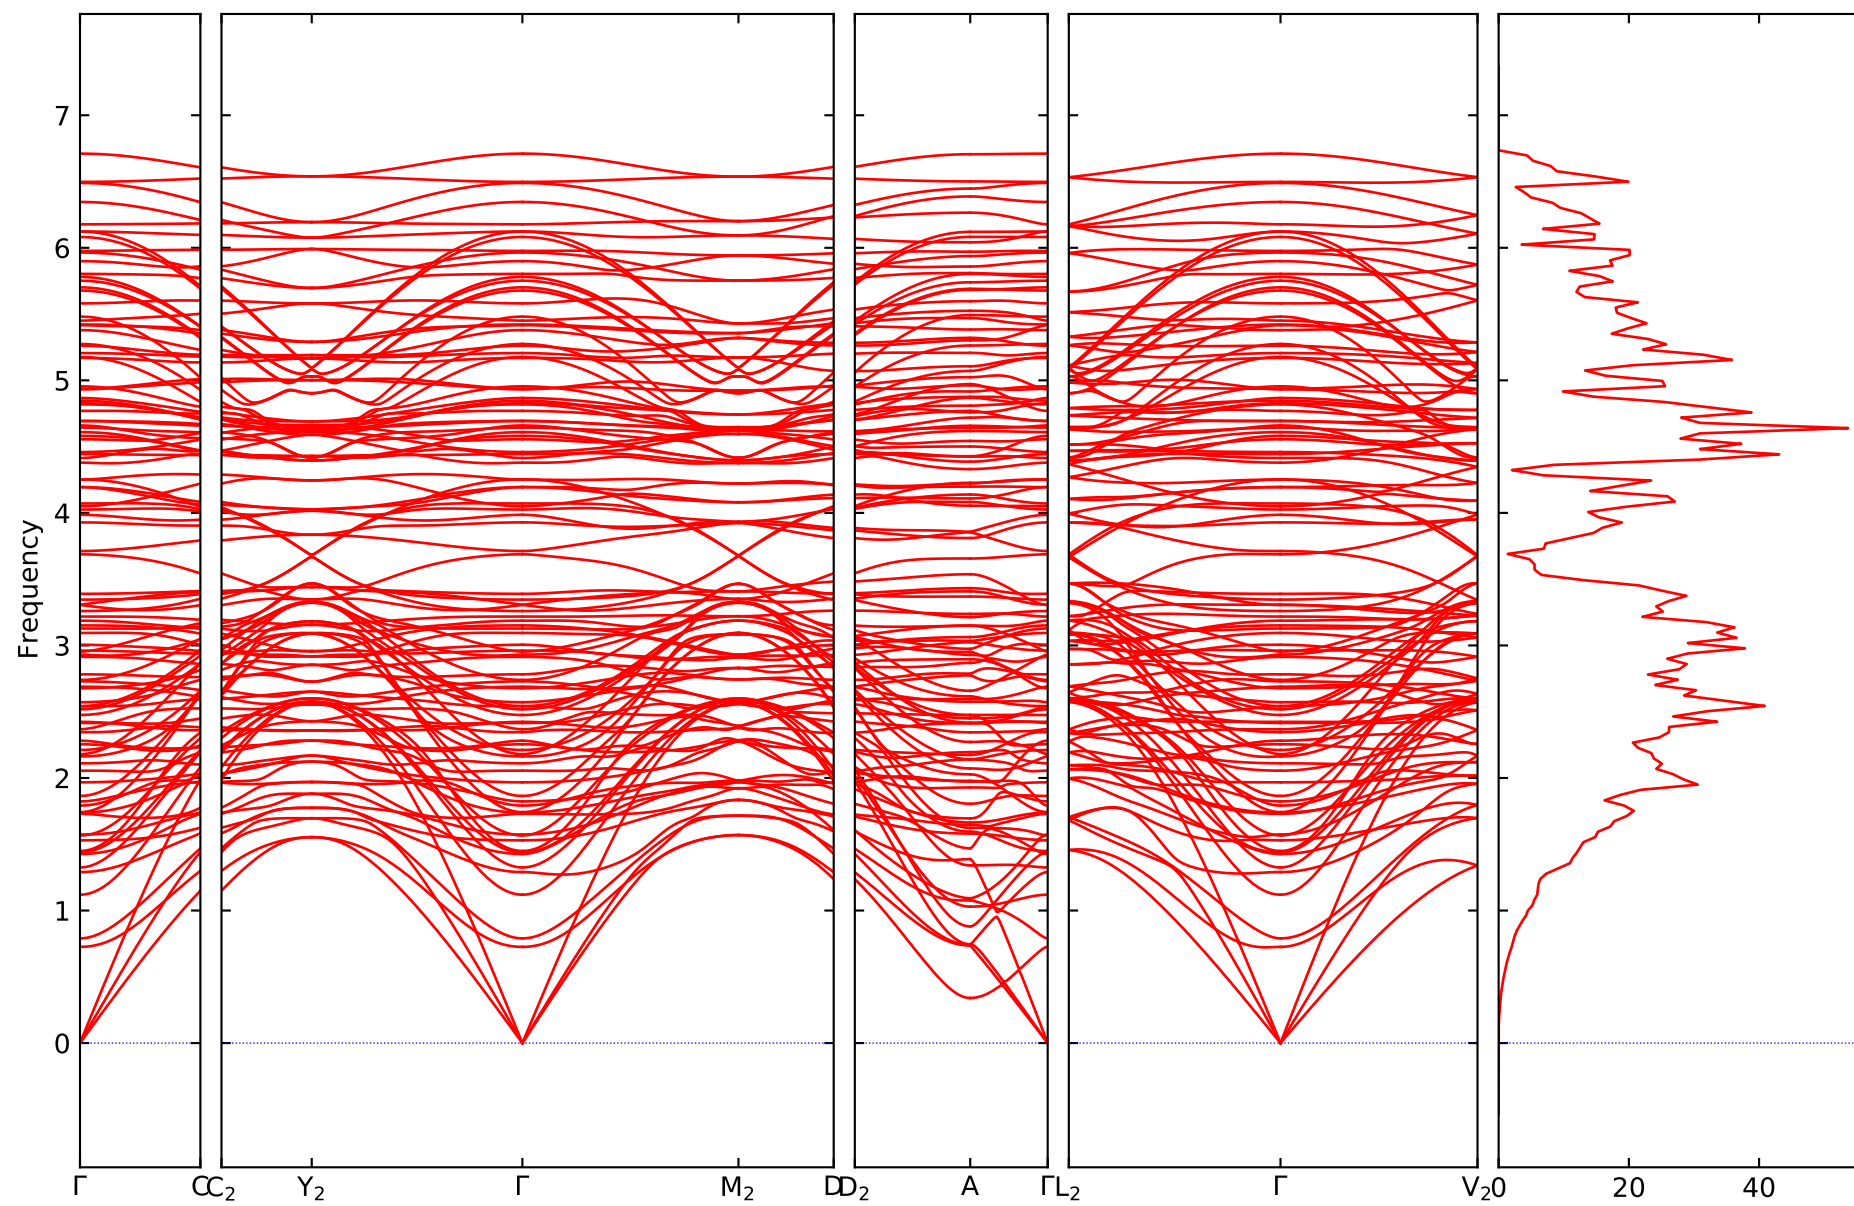

Supplement: d5ta01128k1.zip [file ph.pdf › SI/NaGe/Structures/Na13Ge6_EA6085/ph.pdf]

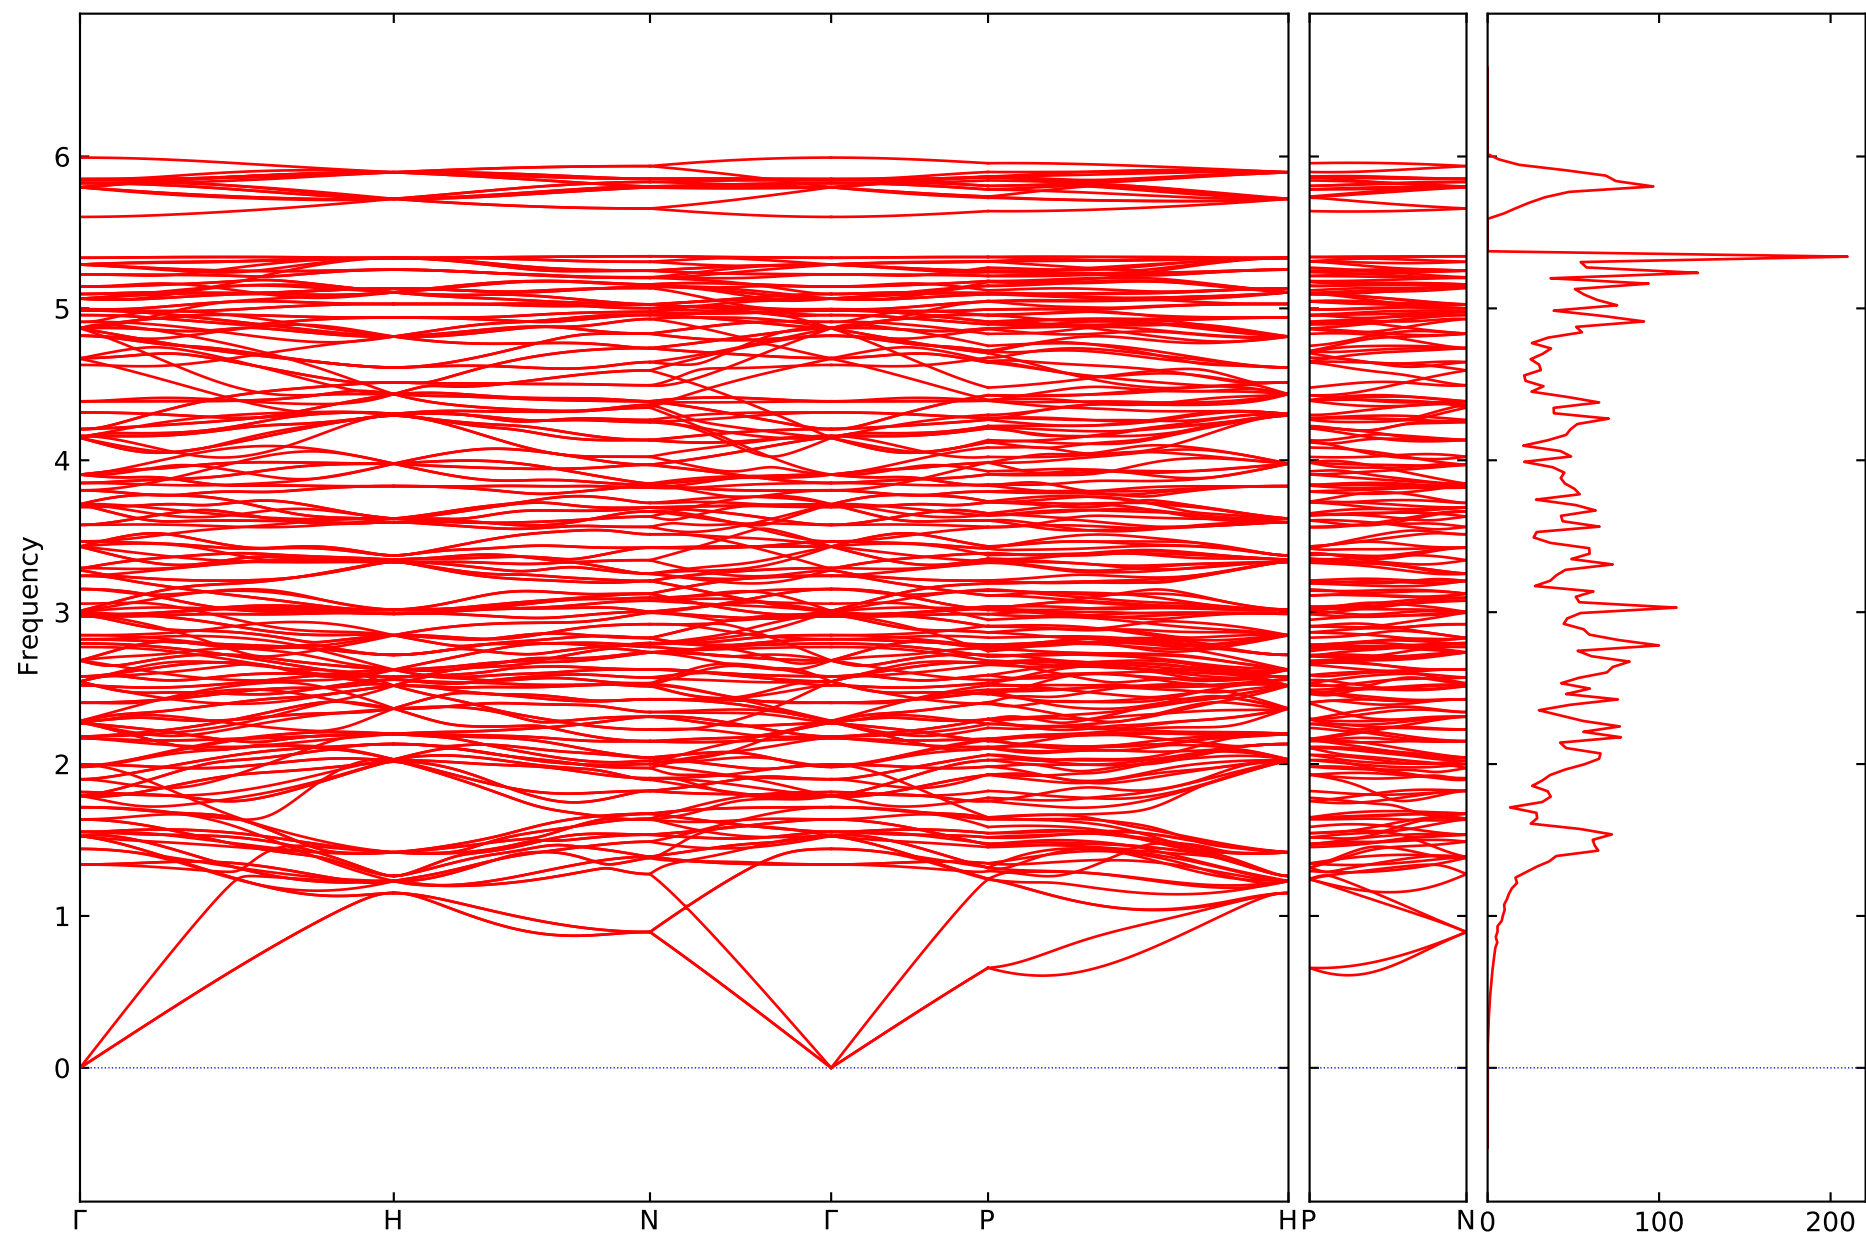

Supplement: d5ta01128k1.zip [file ph.pdf › SI/NaGe/Structures/Na15Ge4/ph.pdf]

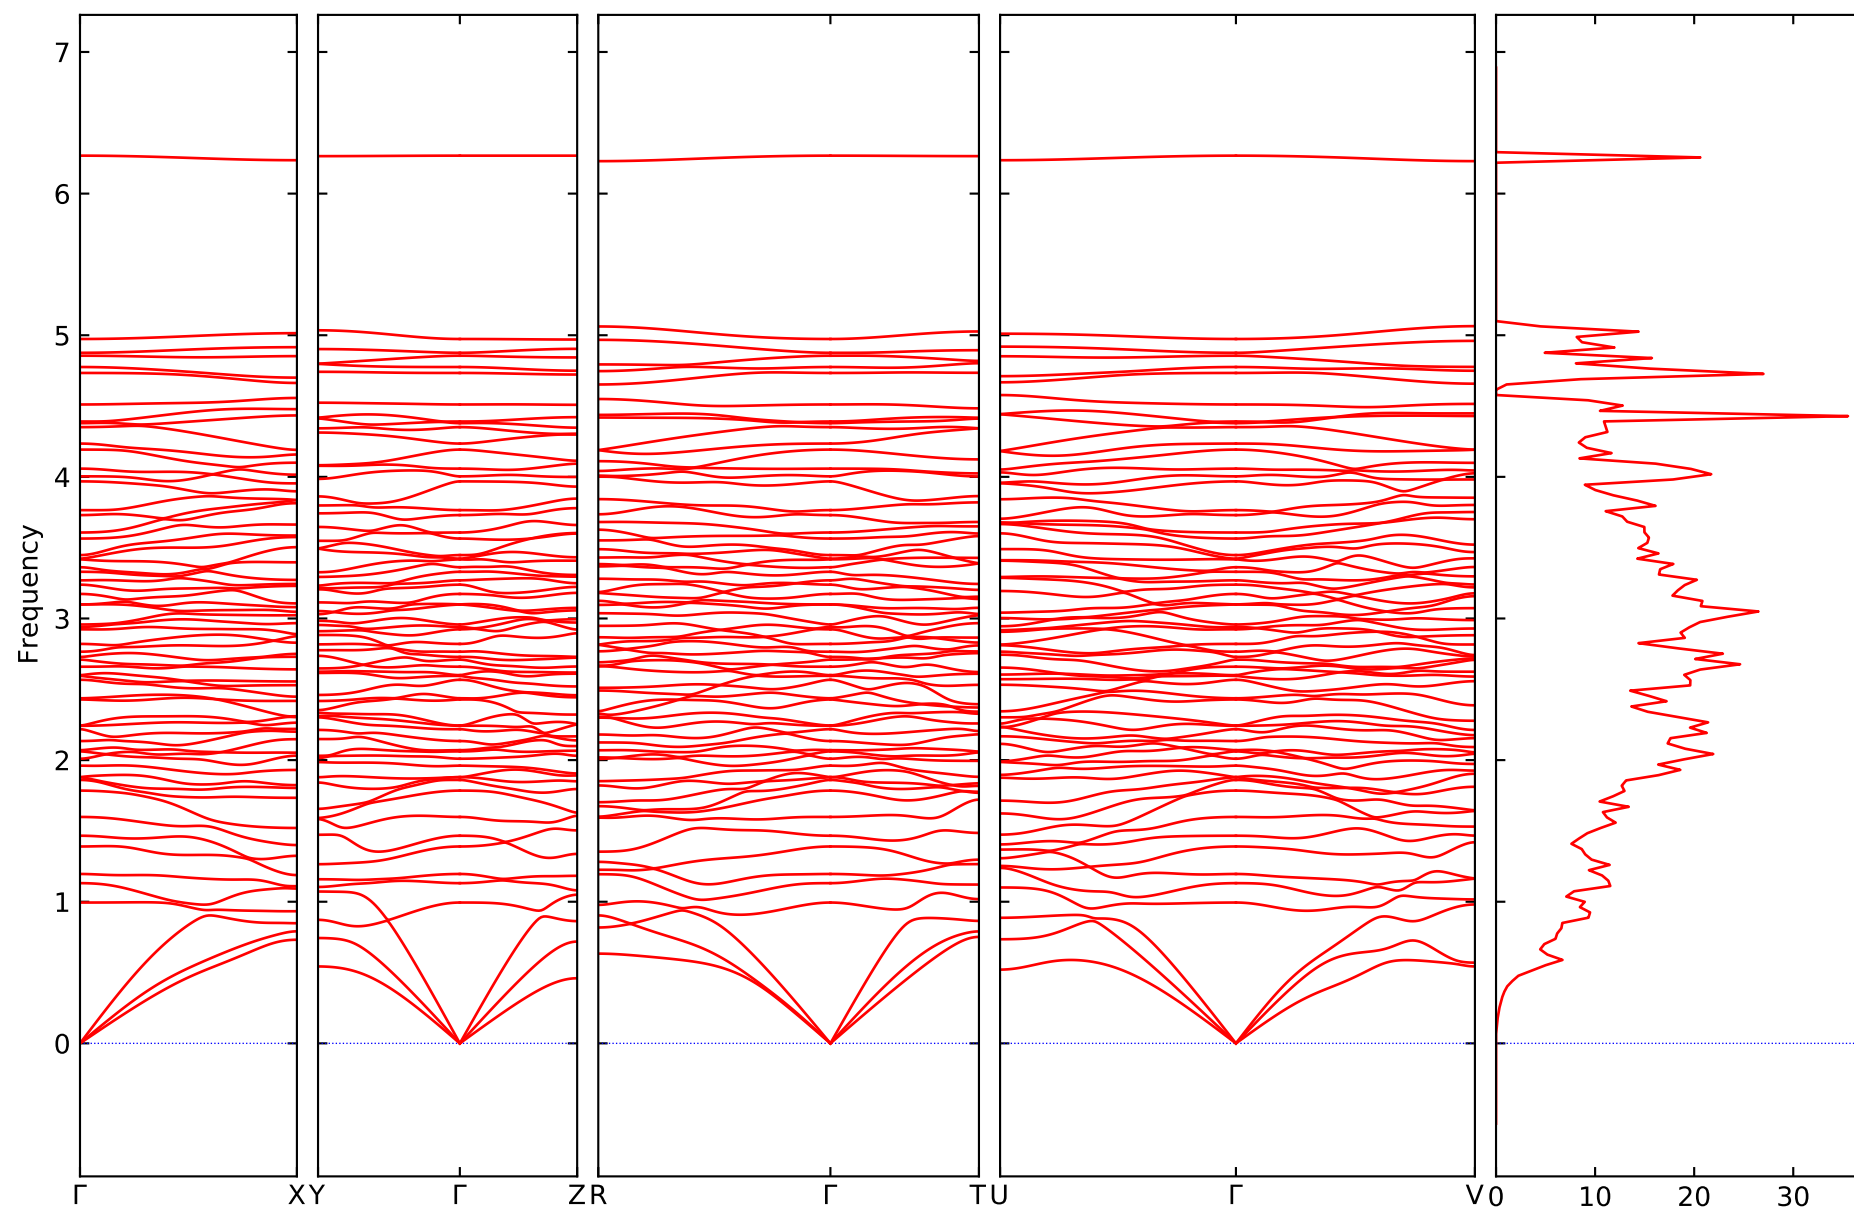

Supplement: d5ta01128k1.zip [file ph.pdf › SI/NaGe/Structures/Na19Ge2_EA10209/ph.pdf]

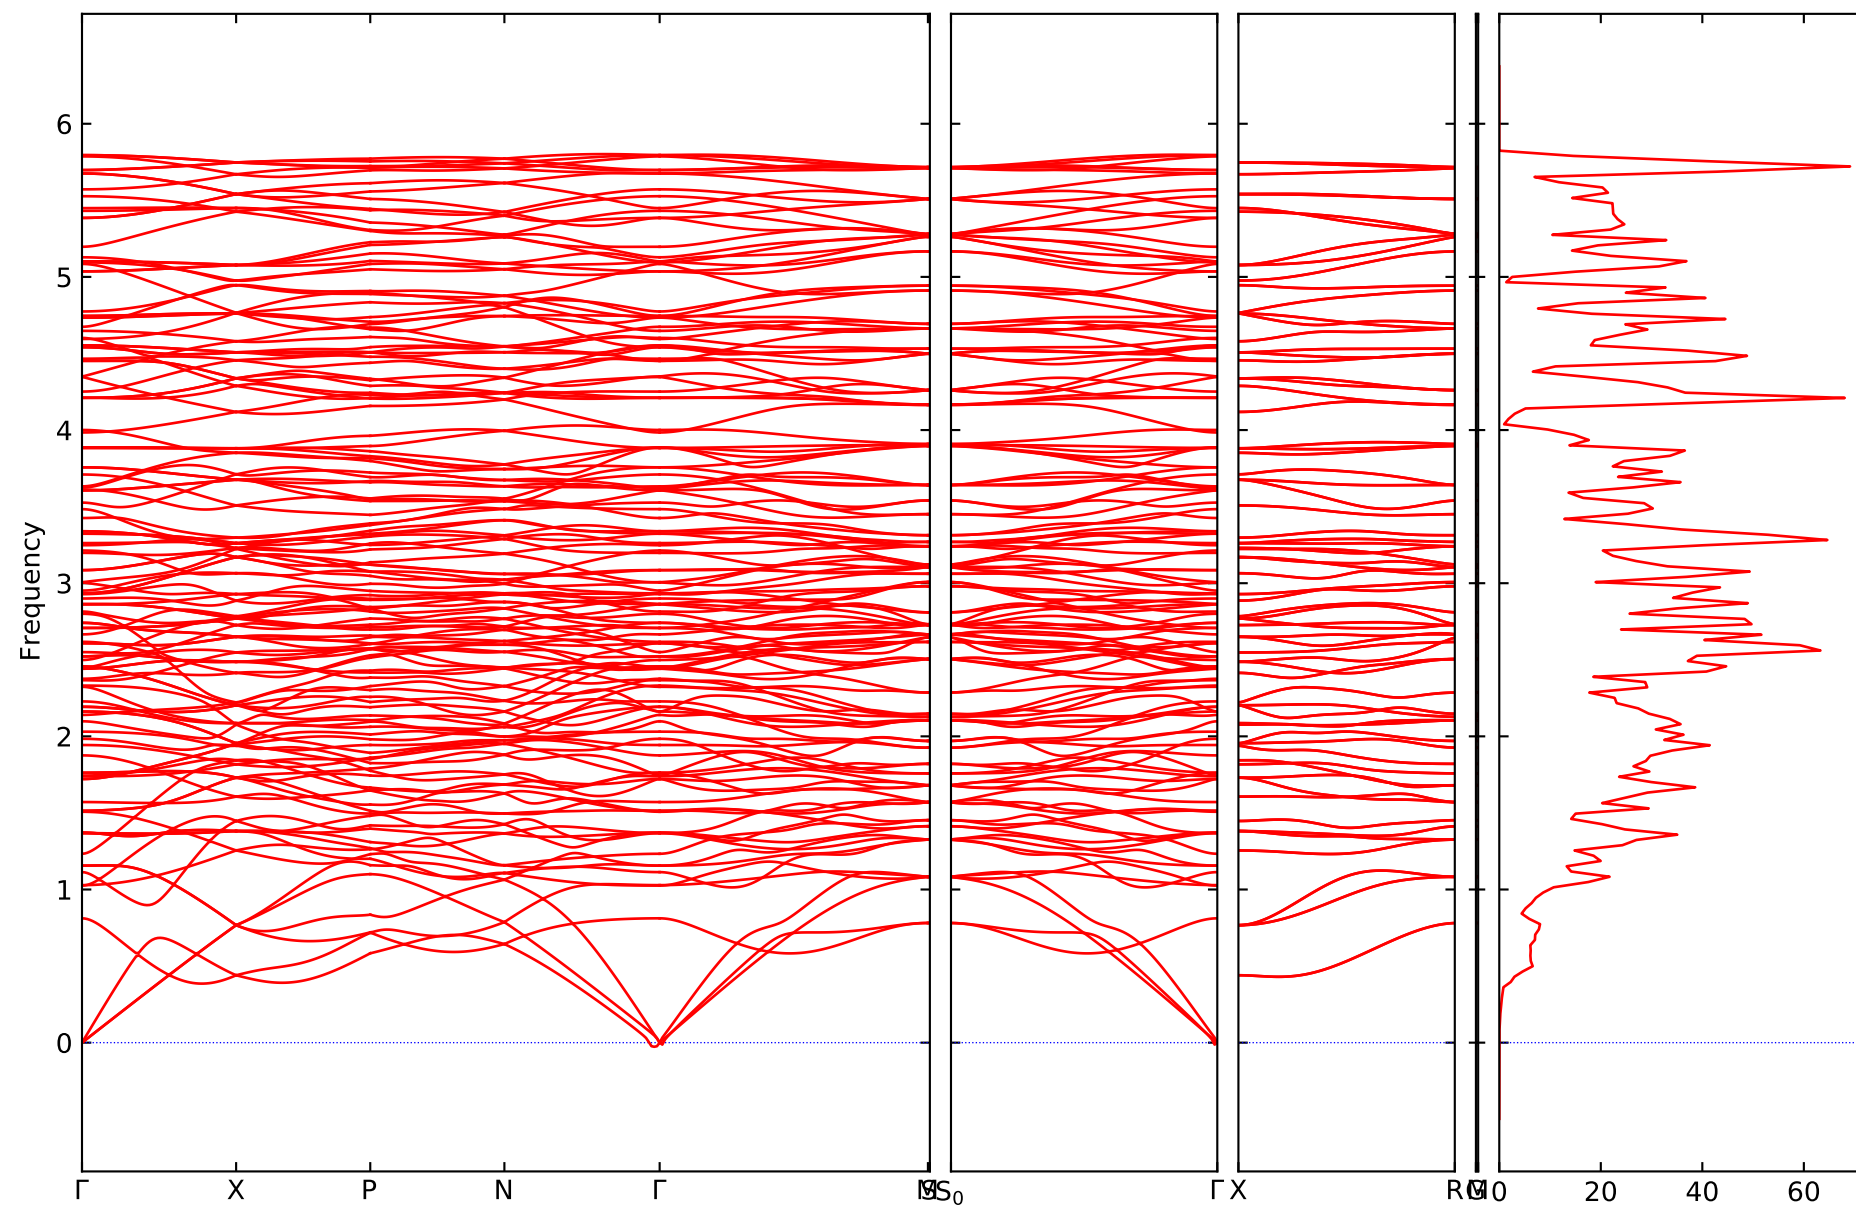

Supplement: d5ta01128k1.zip [file ph.pdf › SI/NaGe/Structures/Na19Ge4_EA7656/ph.pdf]

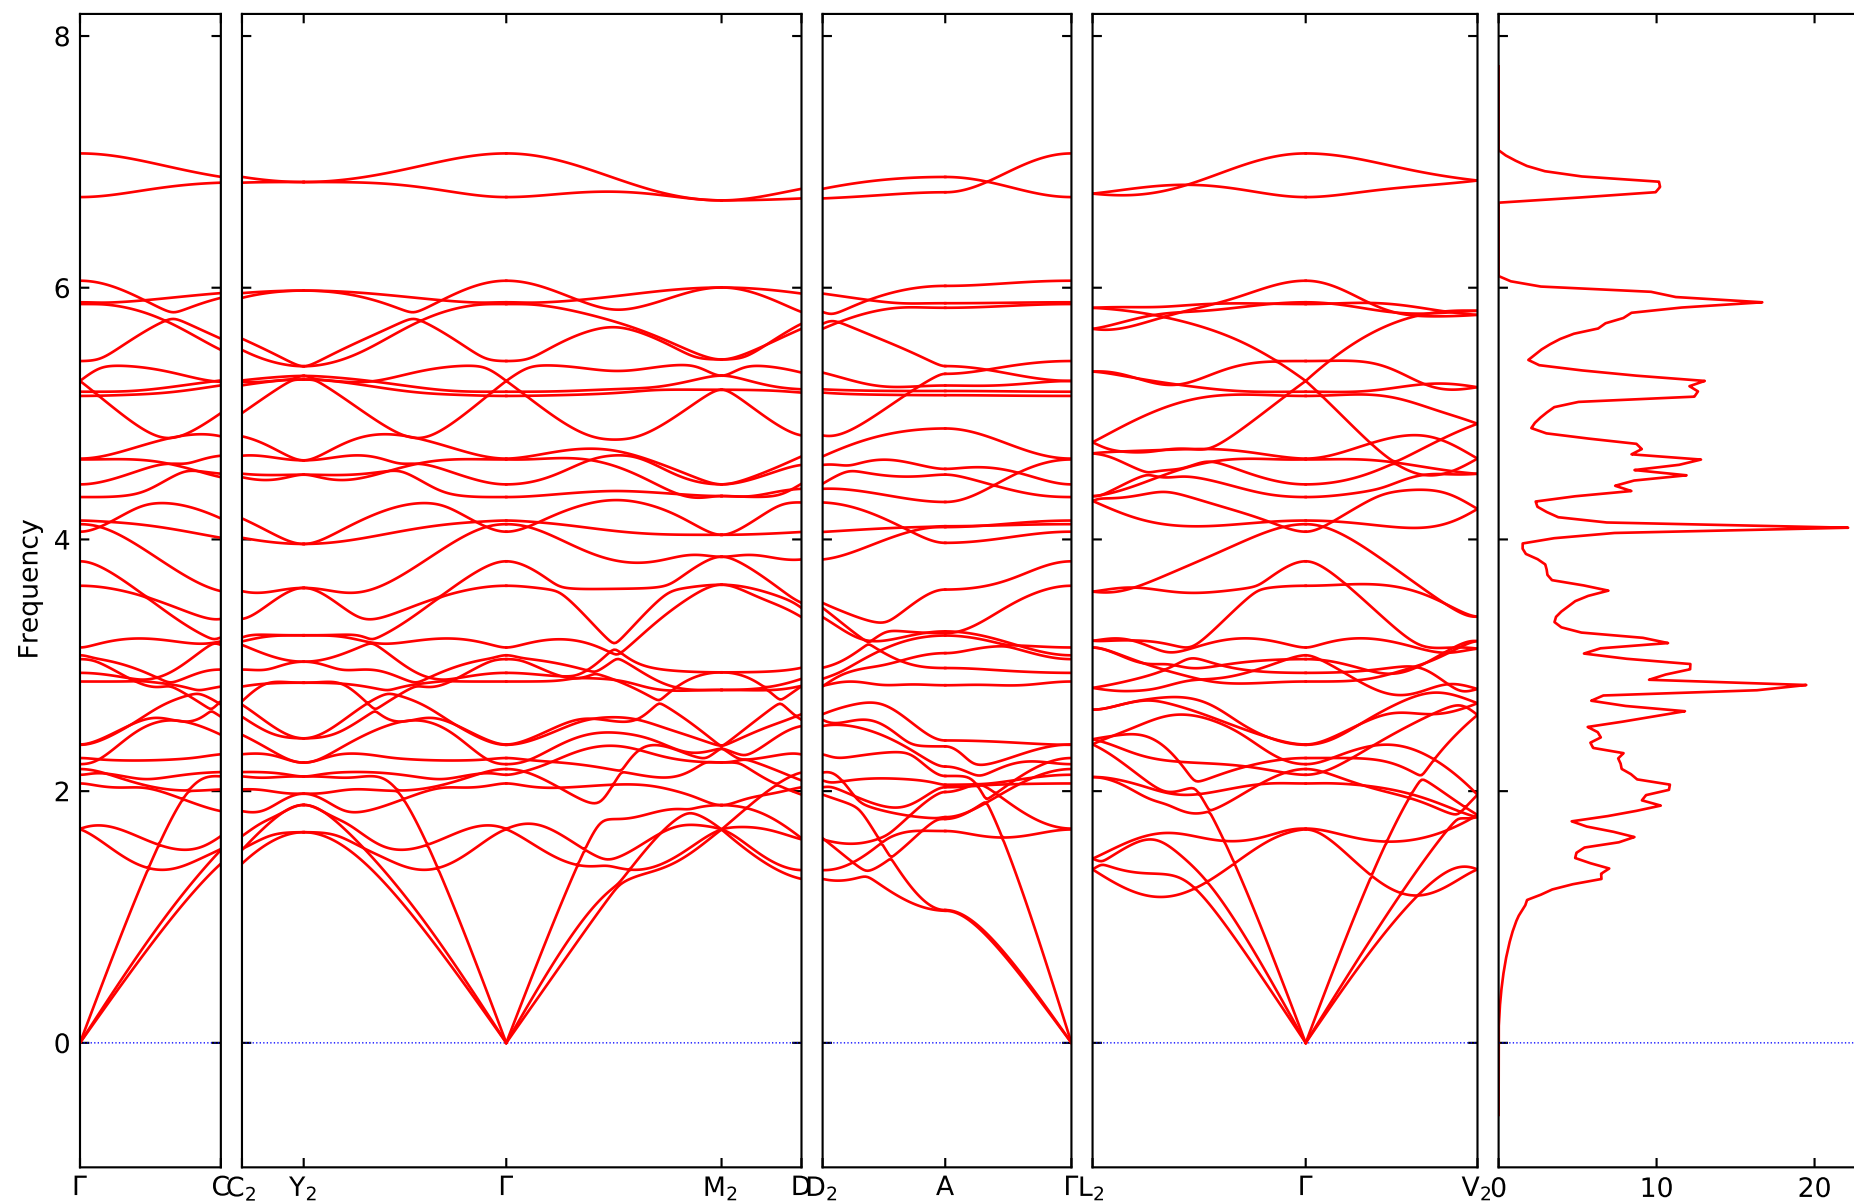

Supplement: d5ta01128k1.zip [file ph.pdf › SI/NaGe/Structures/Na2Ge/ph.pdf]

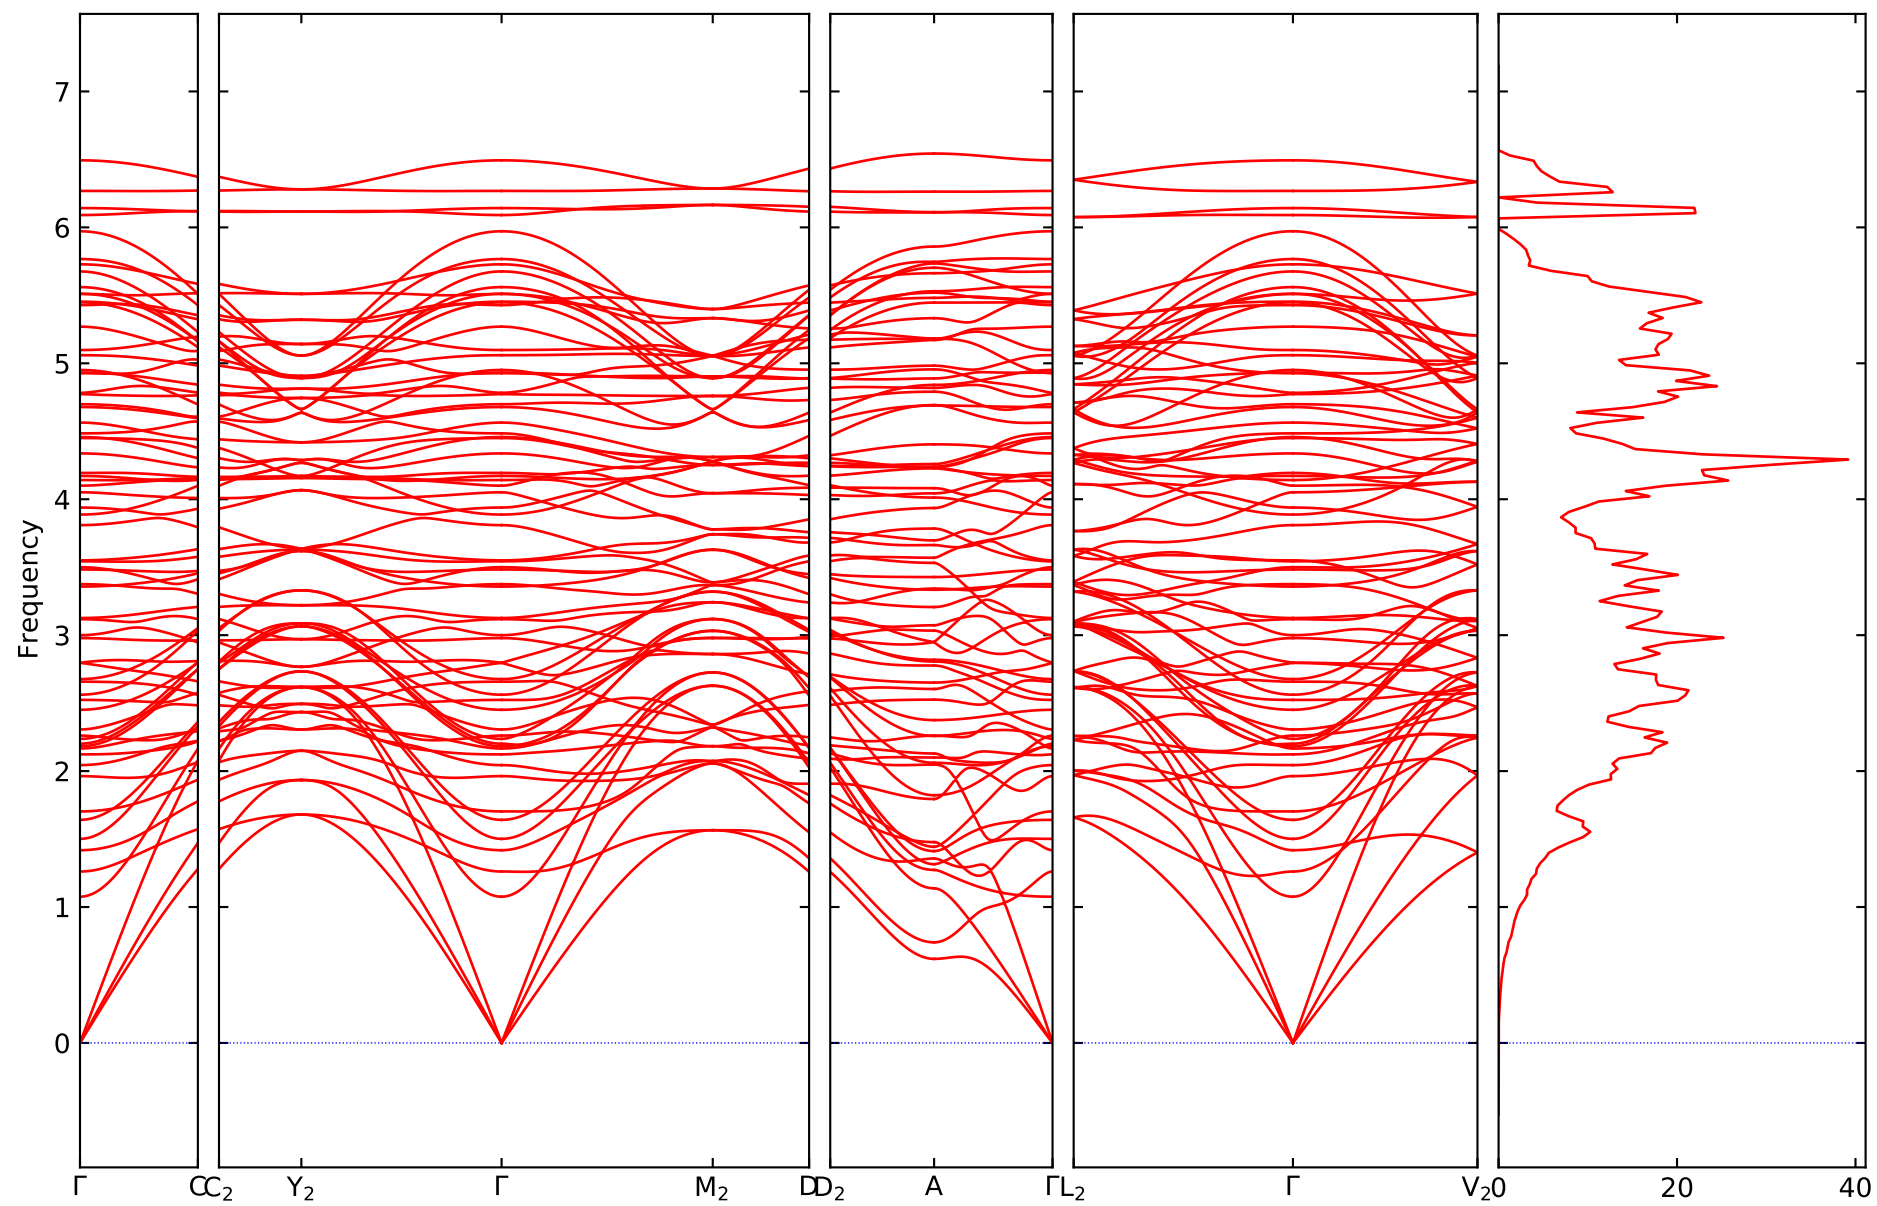

Supplement: d5ta01128k1.zip [file ph.pdf › SI/NaGe/Structures/Na2Ge_EA1724/ph.pdf]

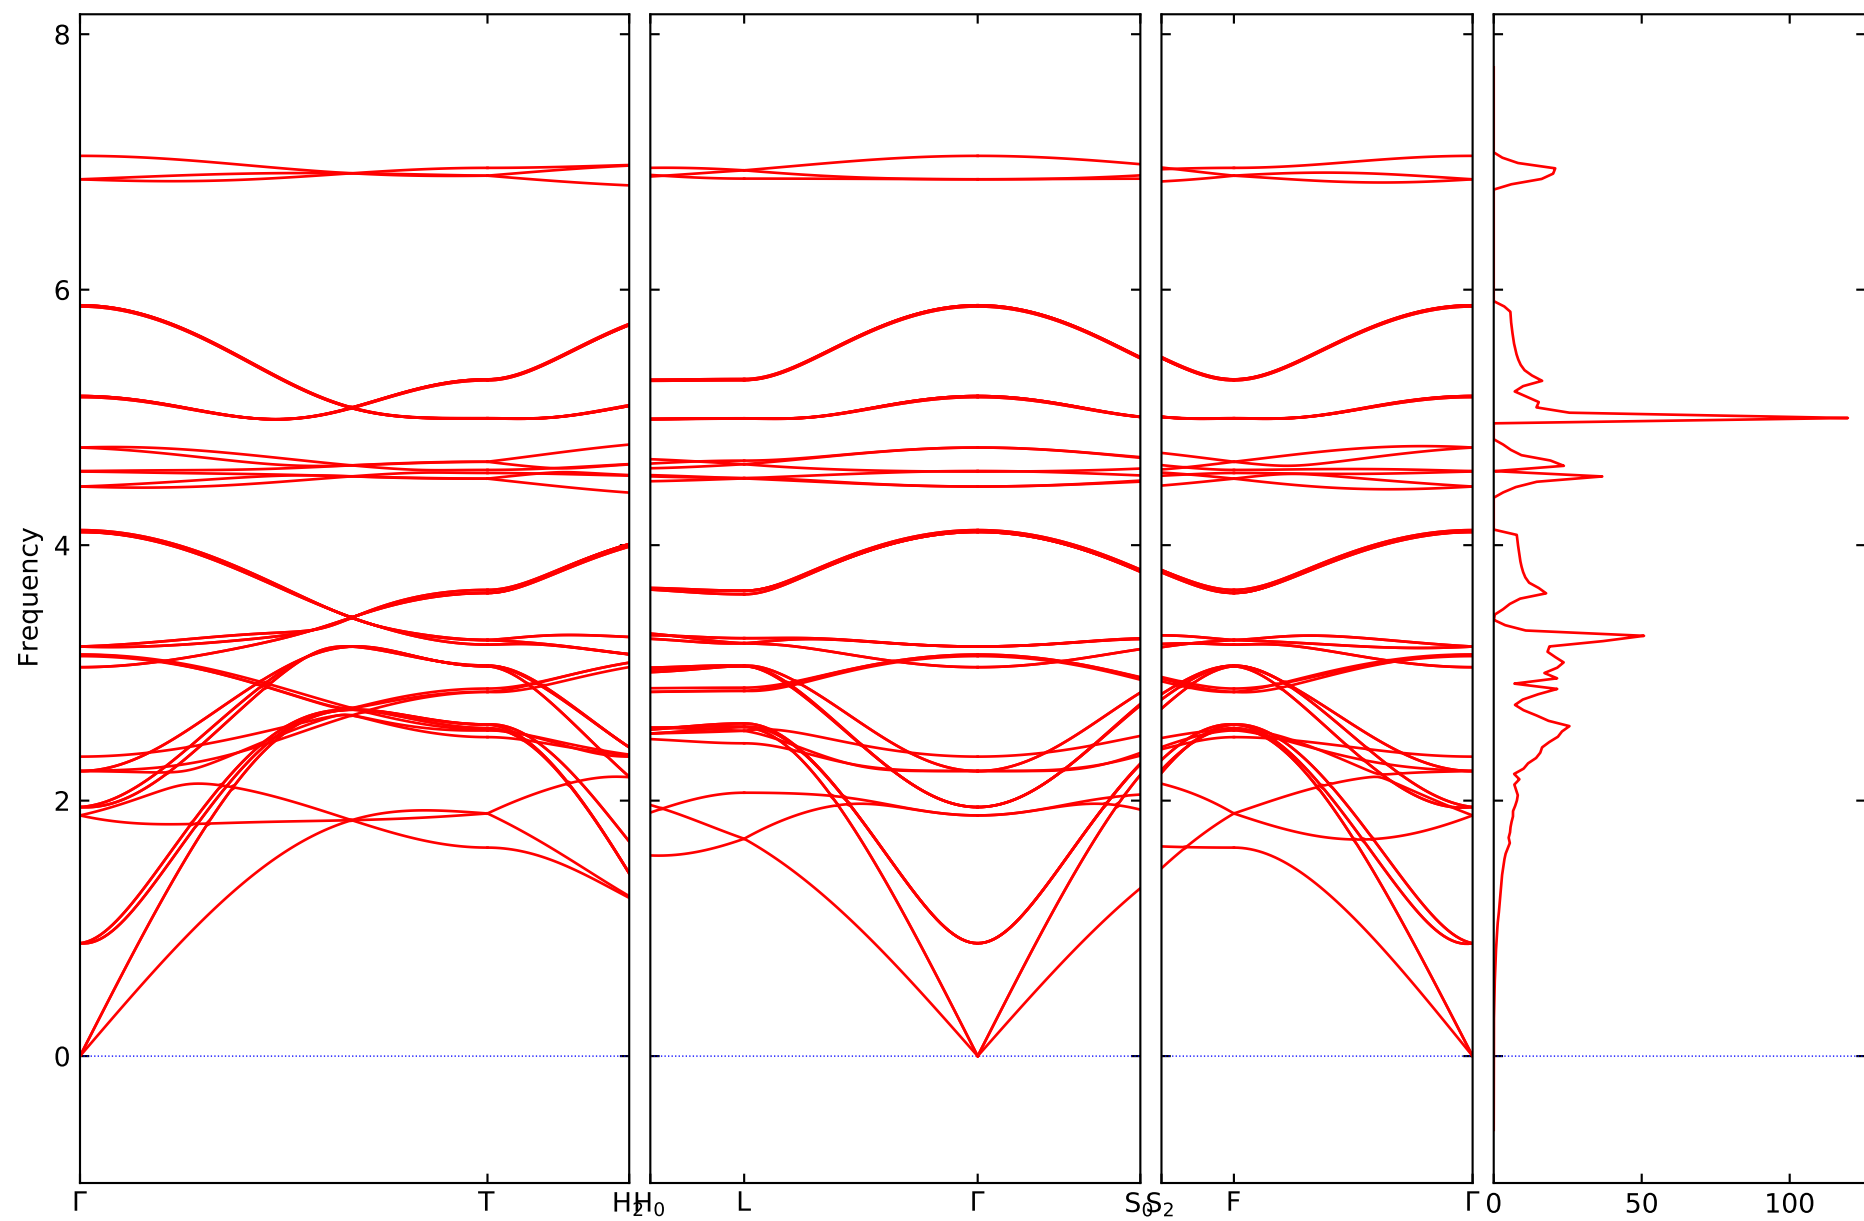

Supplement: d5ta01128k1.zip [file ph.pdf › SI/NaGe/Structures/Na2Ge_Li2Si/ph.pdf]

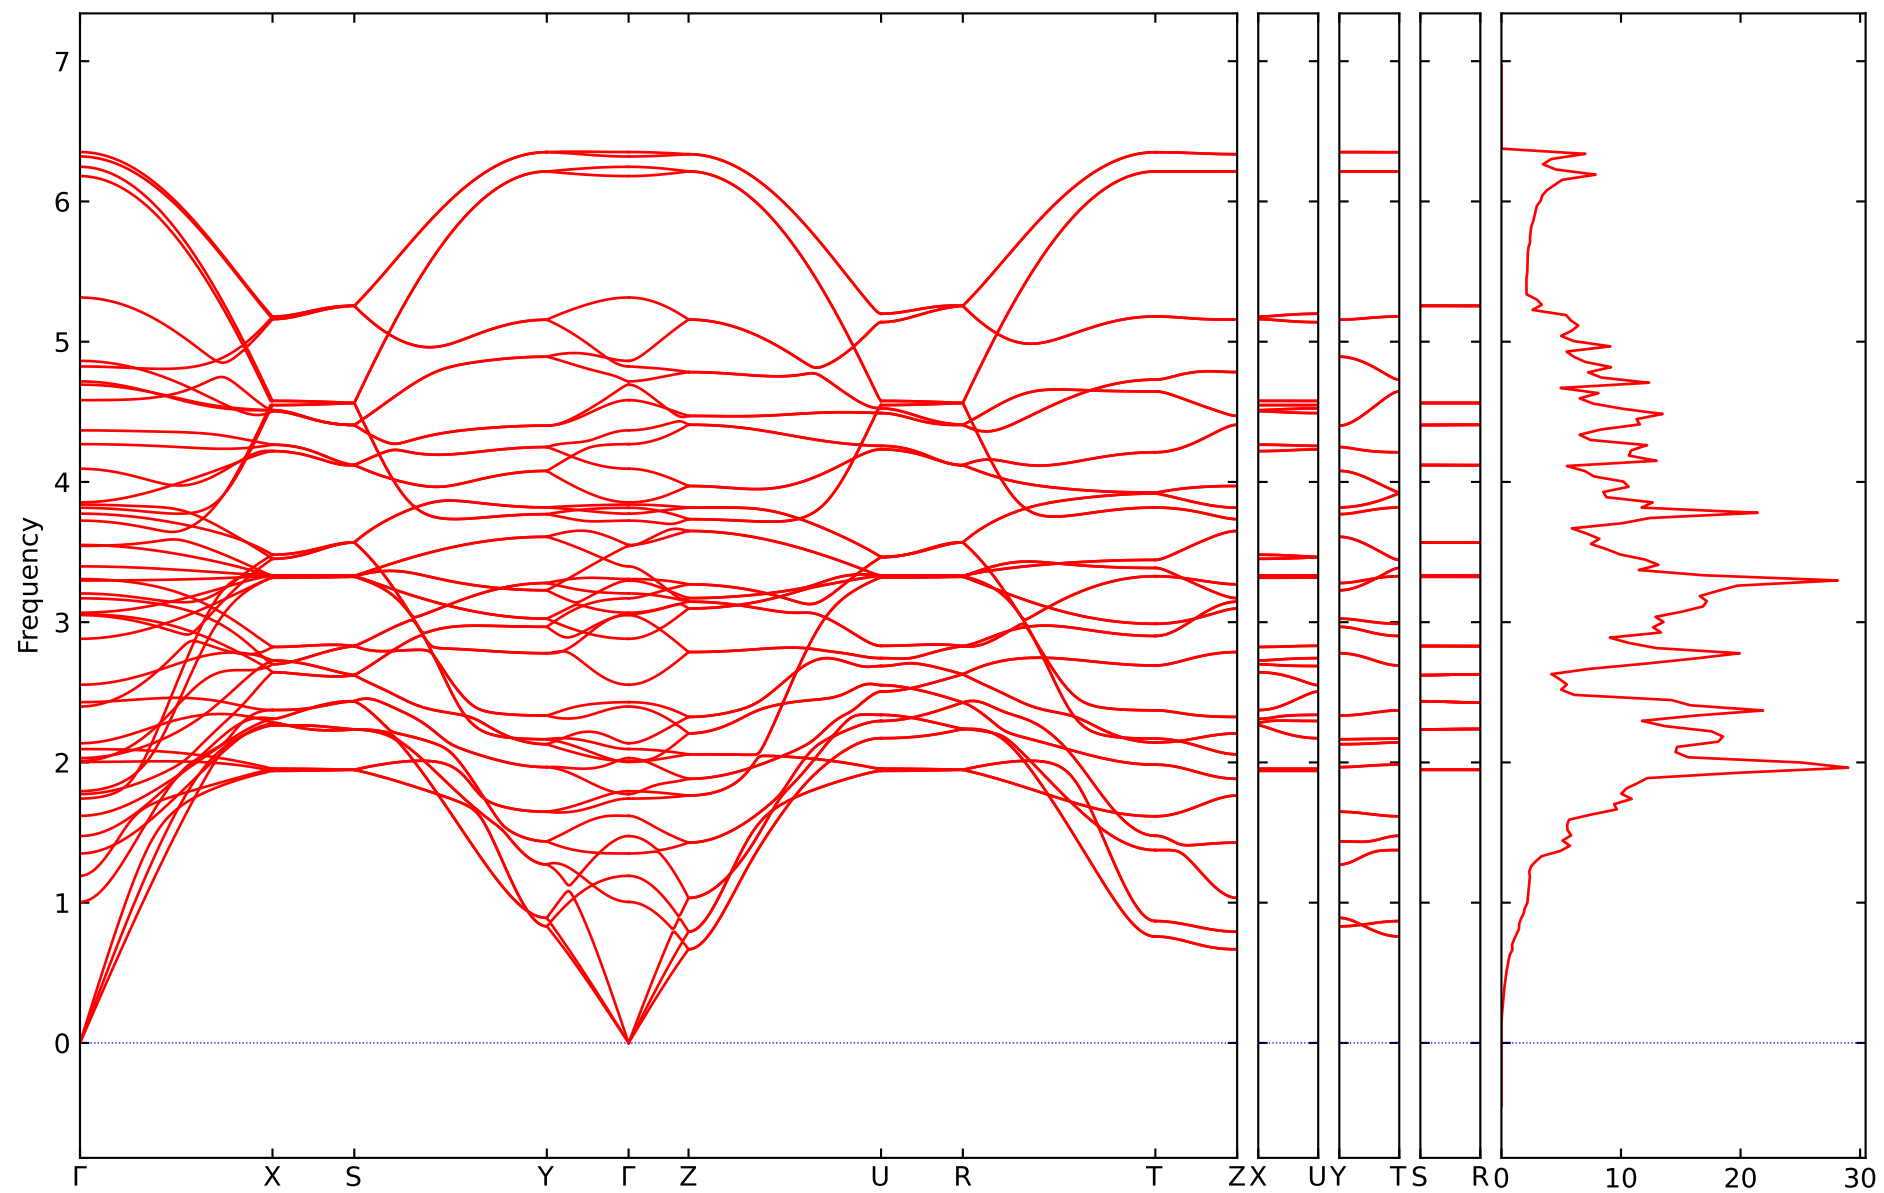

Supplement: d5ta01128k1.zip [file ph.pdf › SI/NaGe/Structures/Na3Ge_Morris/ph.pdf]

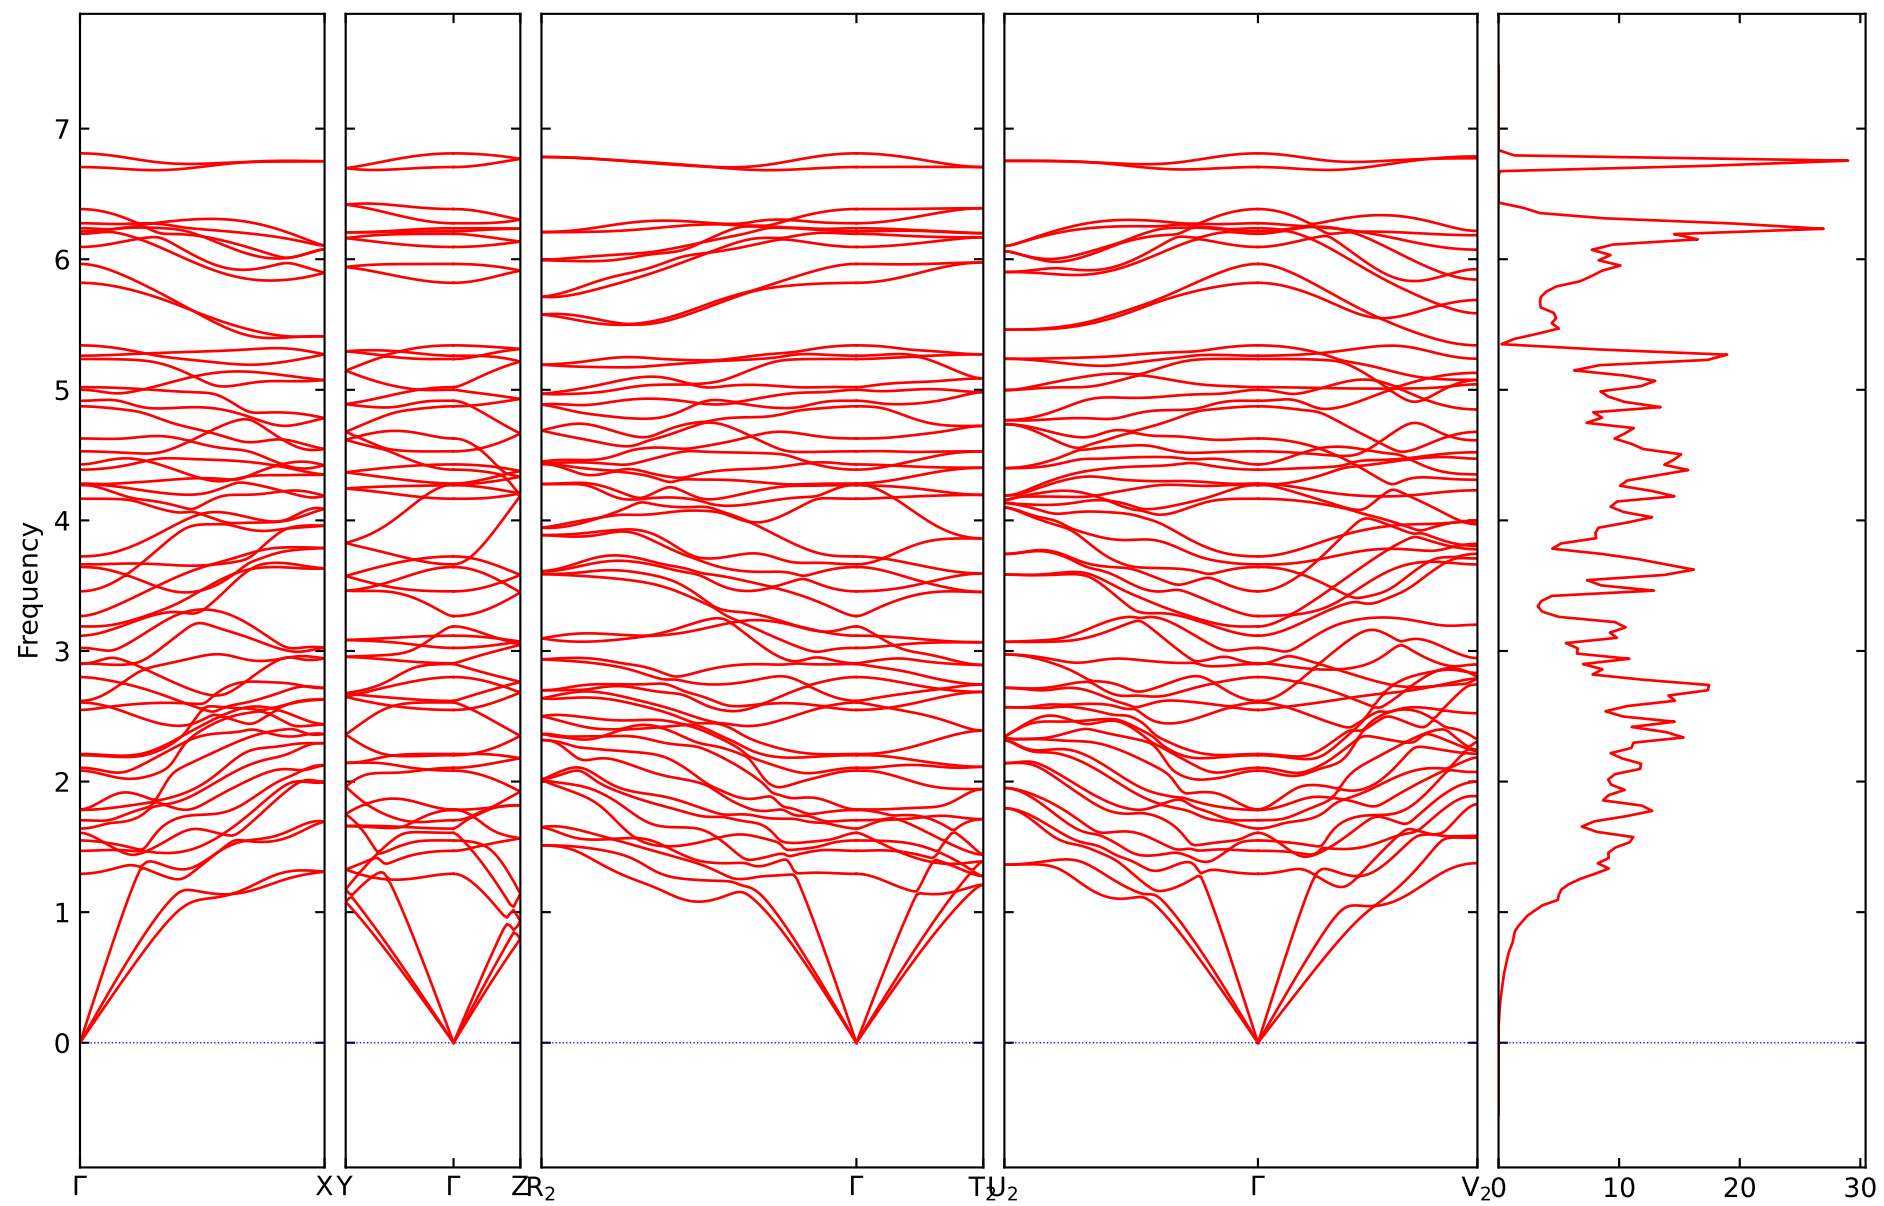

Supplement: d5ta01128k1.zip [file ph.pdf › SI/NaGe/Structures/Na5Ge4_Morris/ph.pdf]

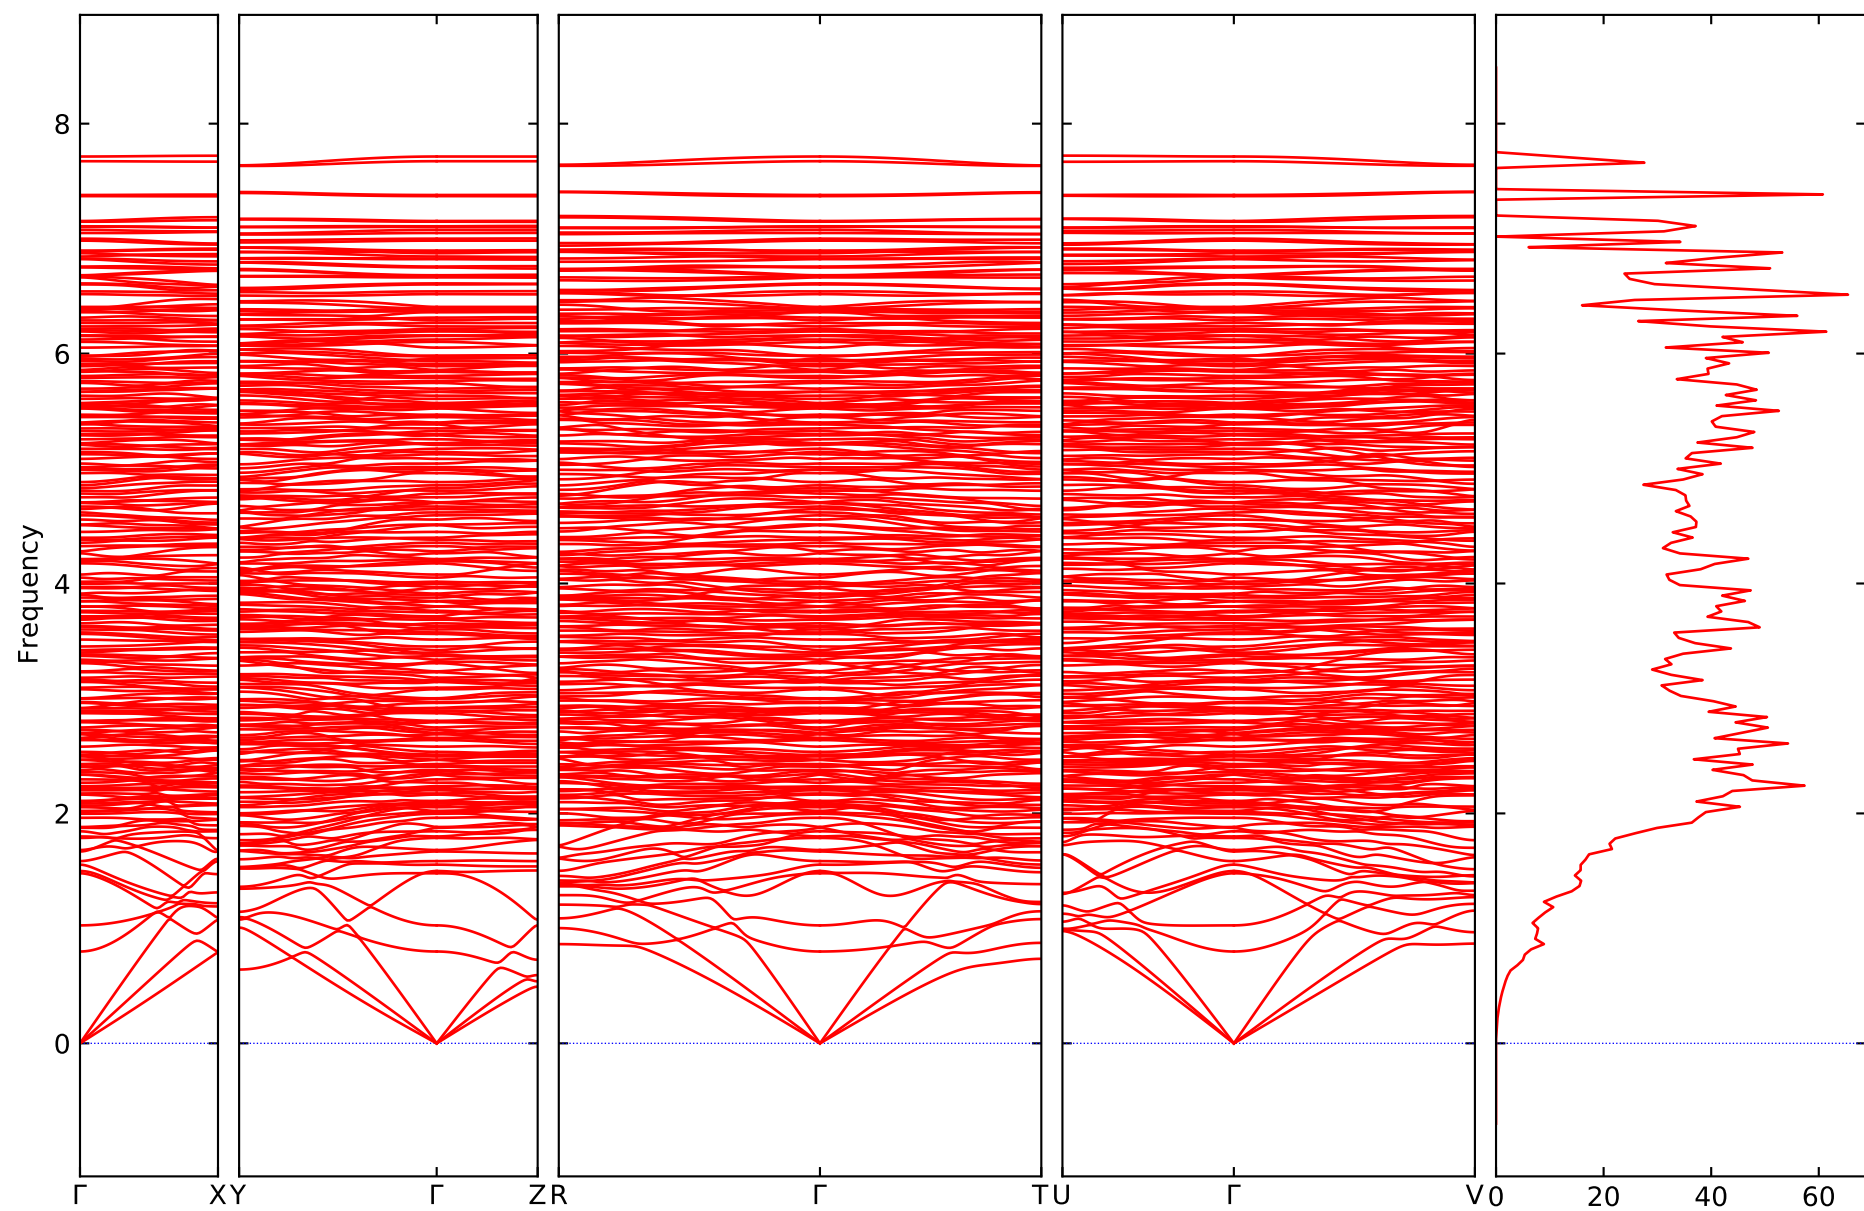

Supplement: d5ta01128k1.zip [file ph.pdf › SI/NaGe/Structures/Na7Ge12_Li7Ge12/ph.pdf]

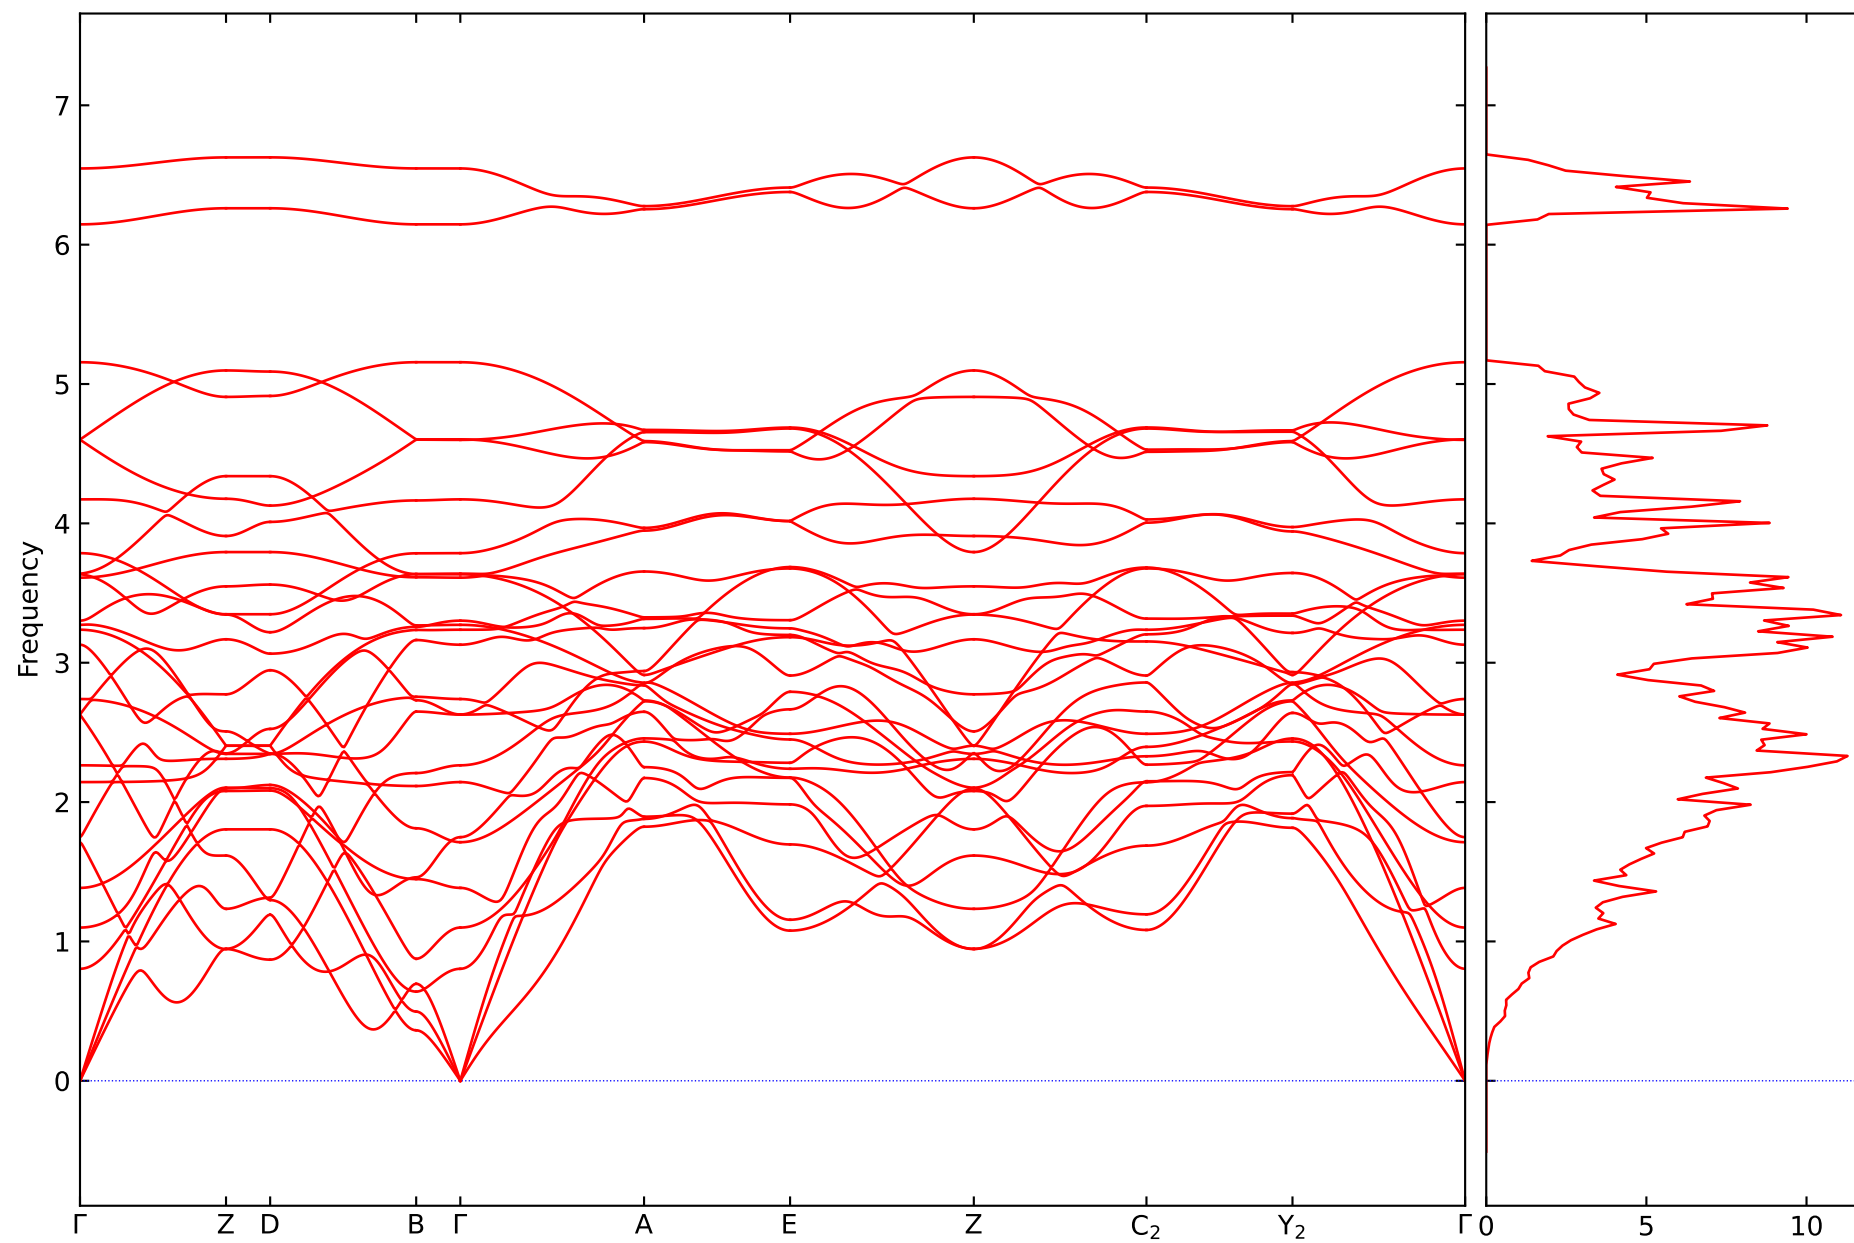

Supplement: d5ta01128k1.zip [file ph.pdf › SI/NaGe/Structures/Na7Ge2_Morris/ph.pdf]

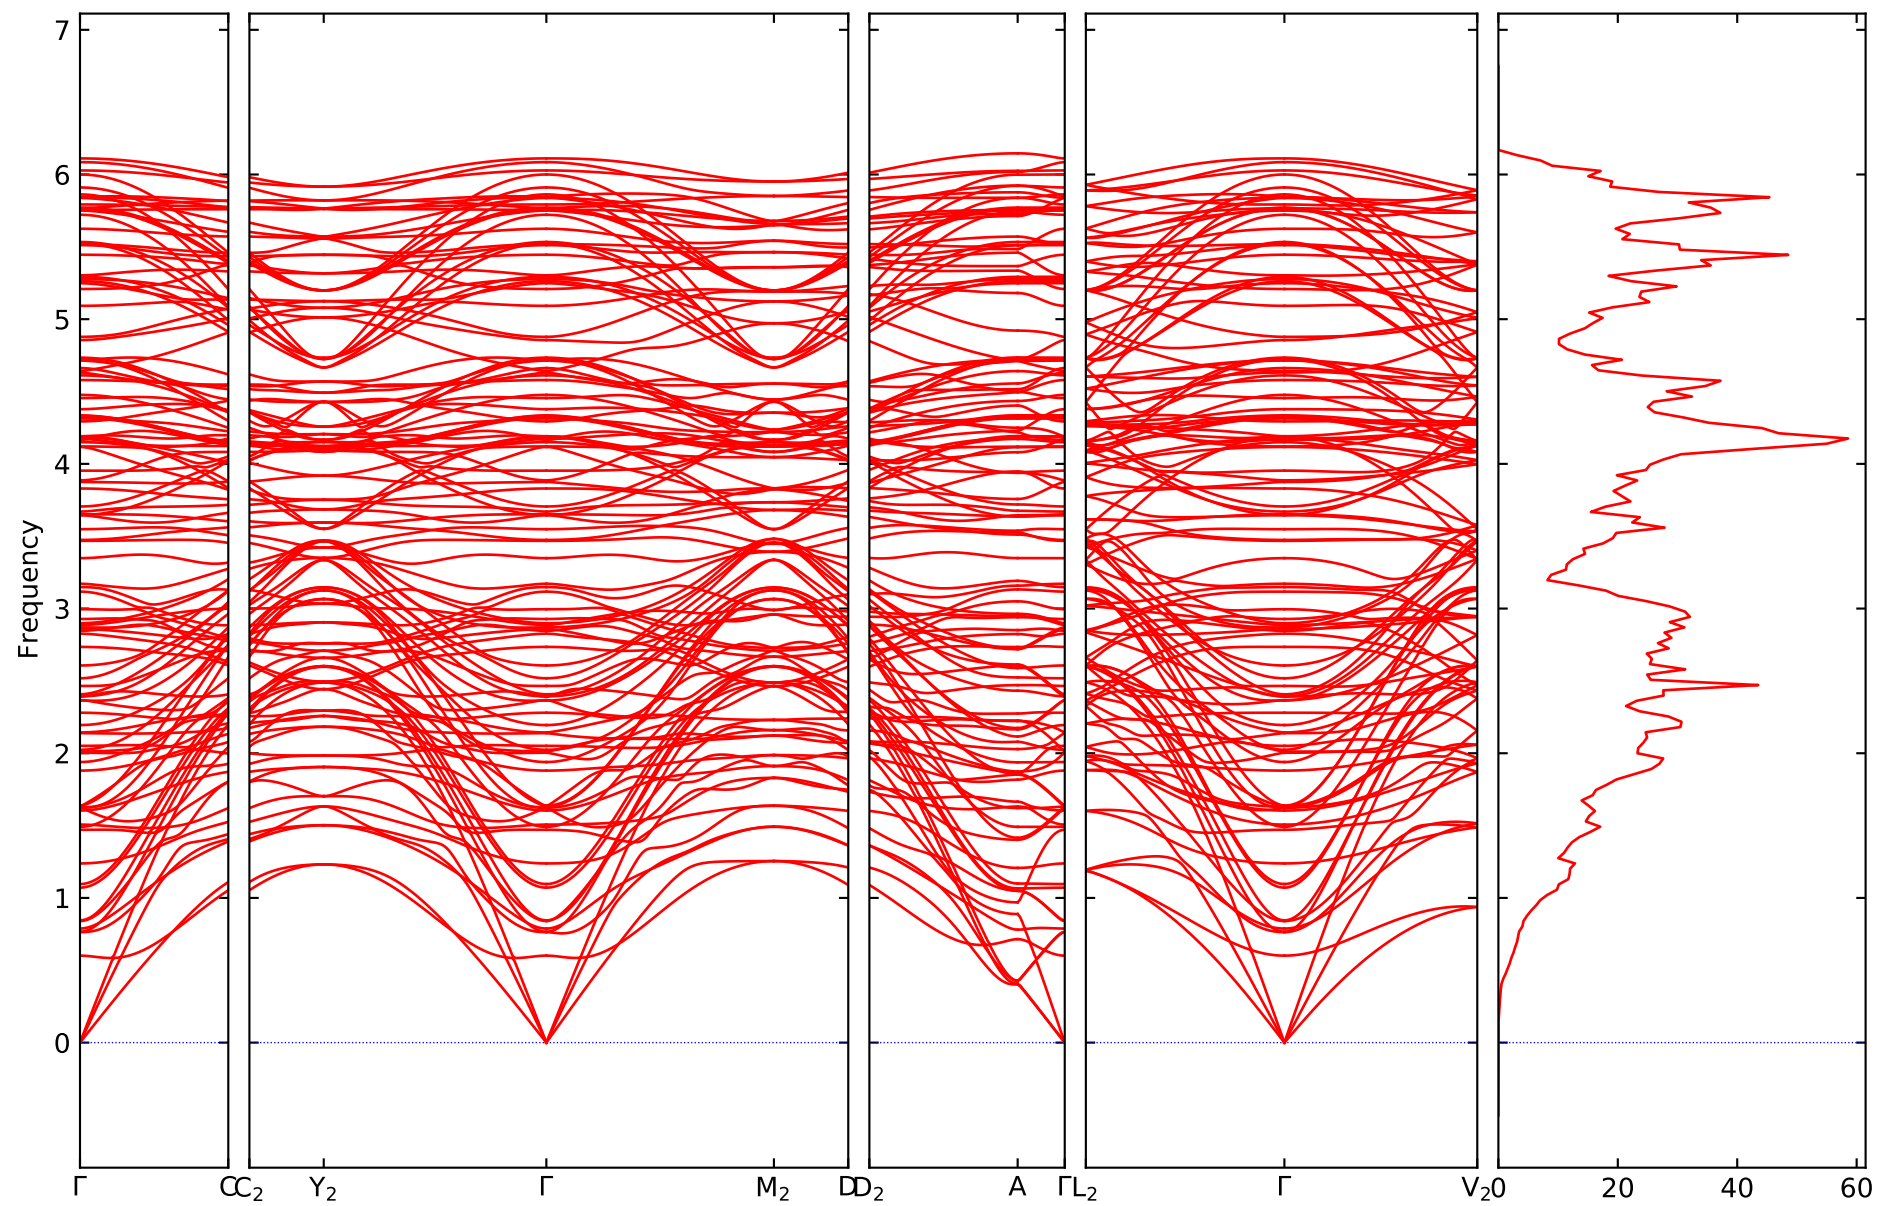

Supplement: d5ta01128k1.zip [file ph.pdf › SI/NaGe/Structures/Na7Ge3/ph.pdf]

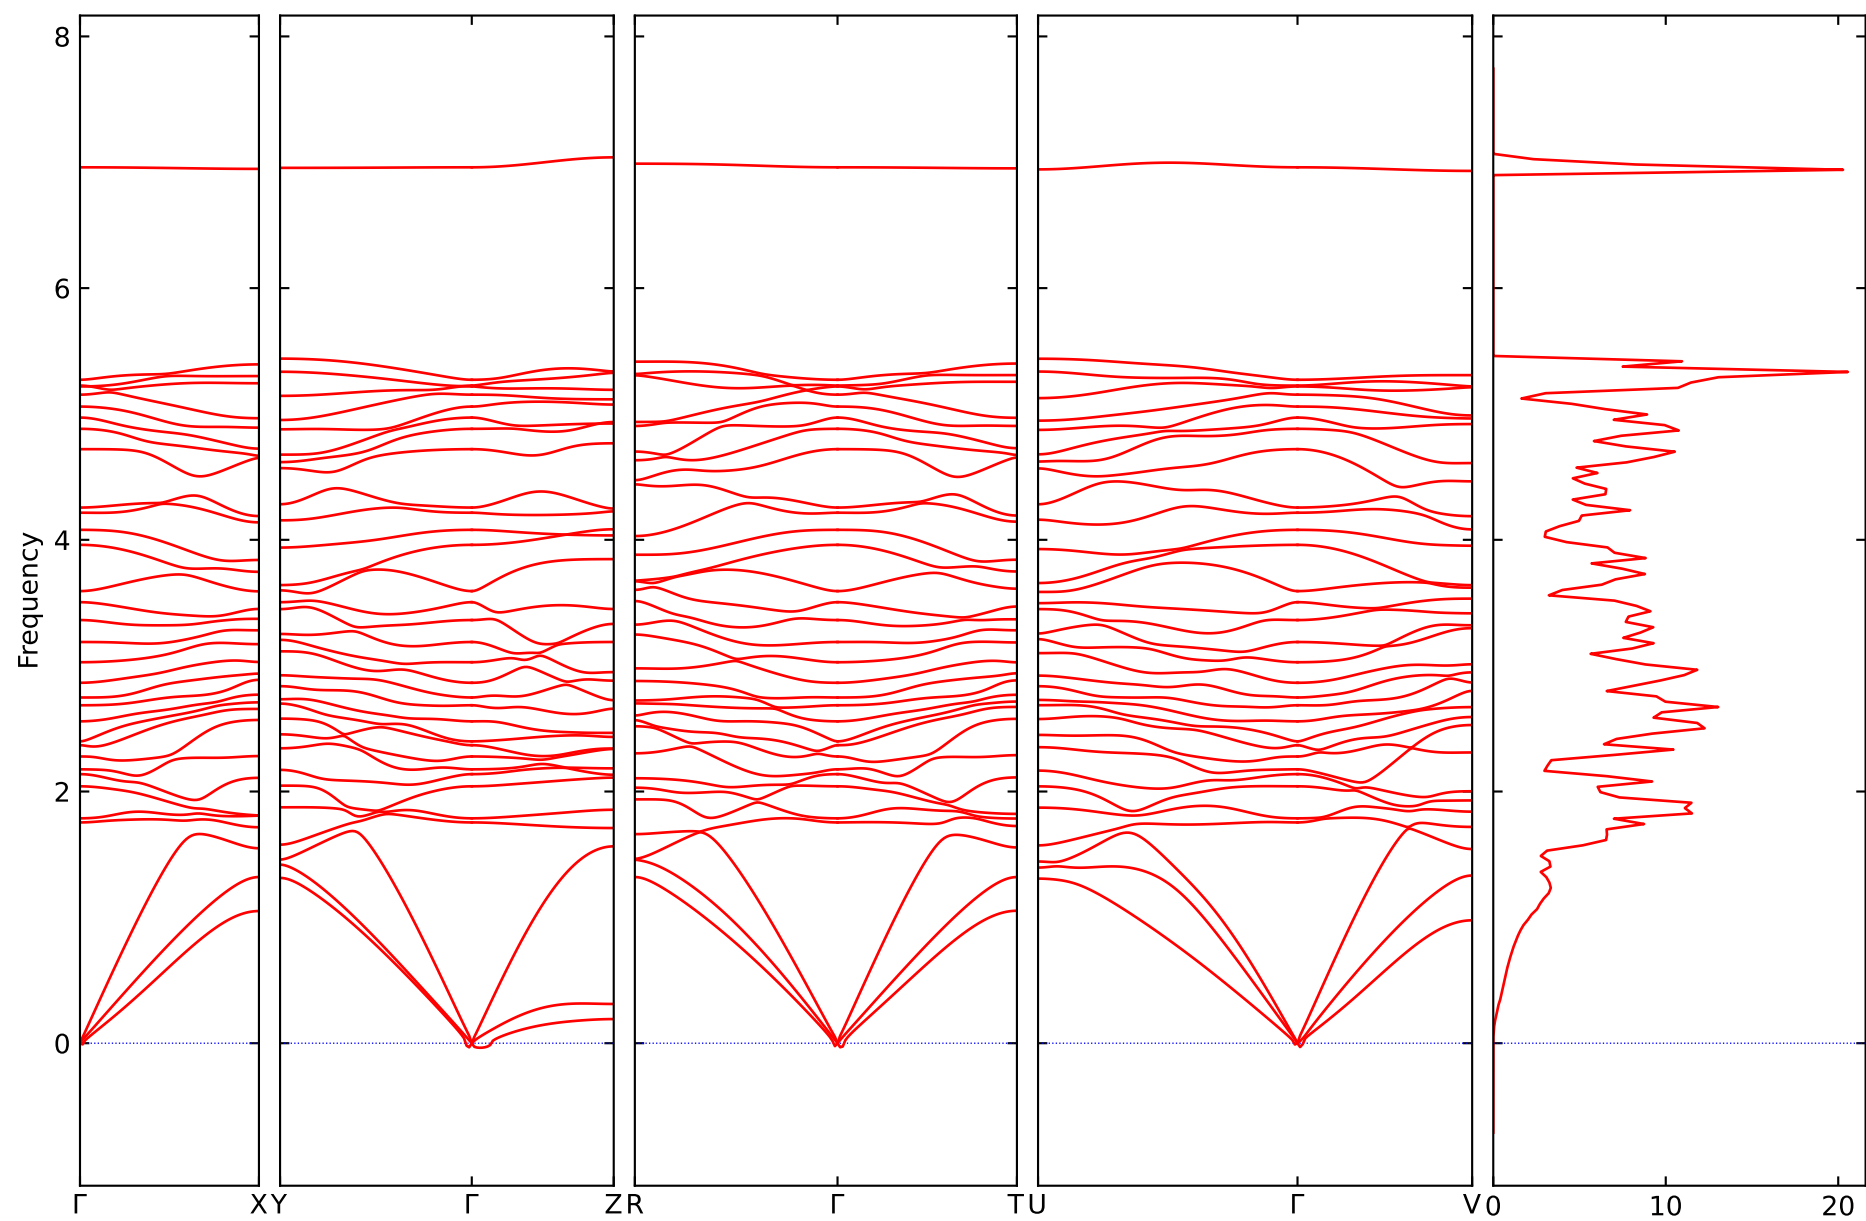

Supplement: d5ta01128k1.zip [file ph.pdf › SI/NaGe/Structures/Na8Ge3/ph.pdf]

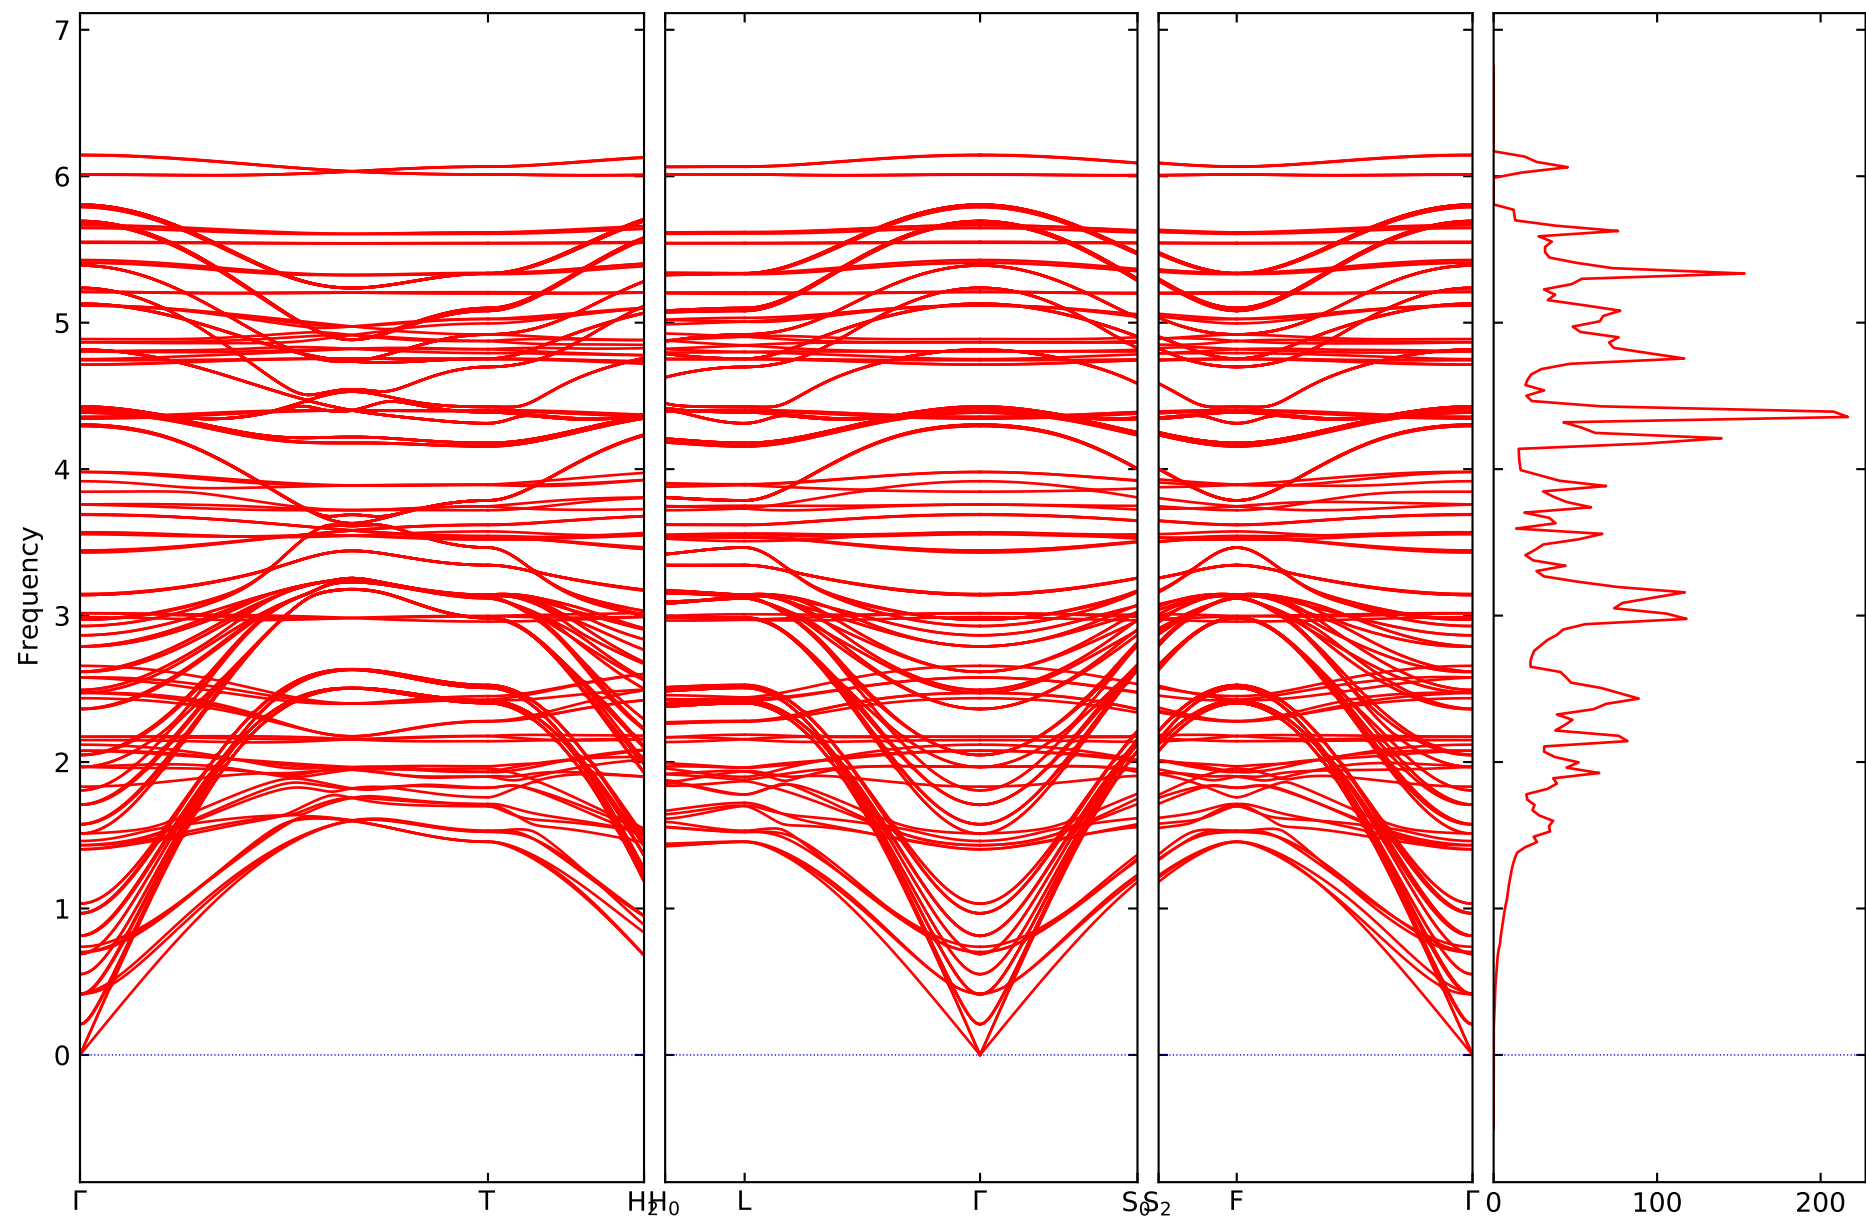

Supplement: d5ta01128k1.zip [file ph.pdf › SI/NaGe/Structures/Na9Ge4_EA6536/ph.pdf]

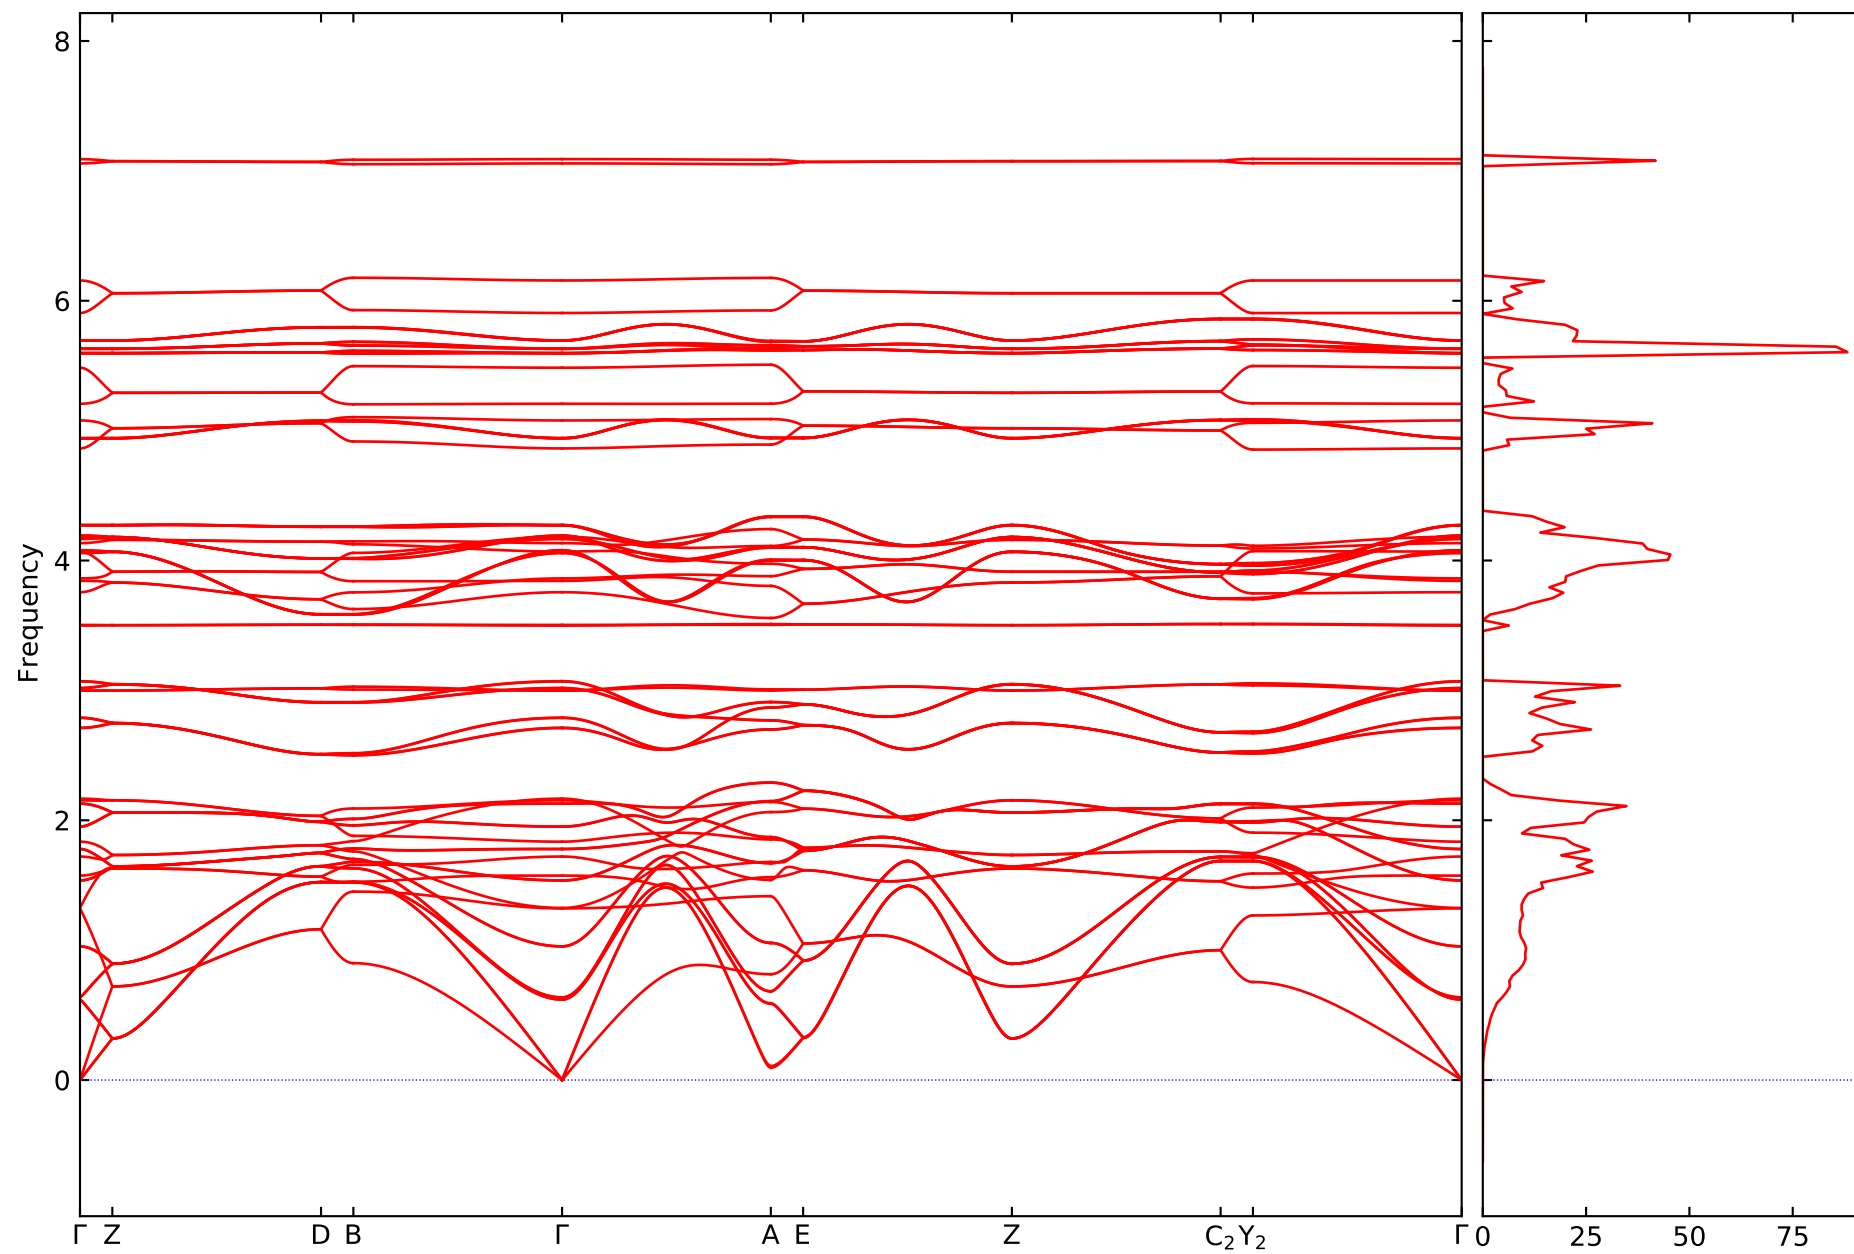

Supplement: d5ta01128k1.zip [file ph.pdf › SI/NaGe/Structures/Na9Ge4_EA763/ph.pdf]

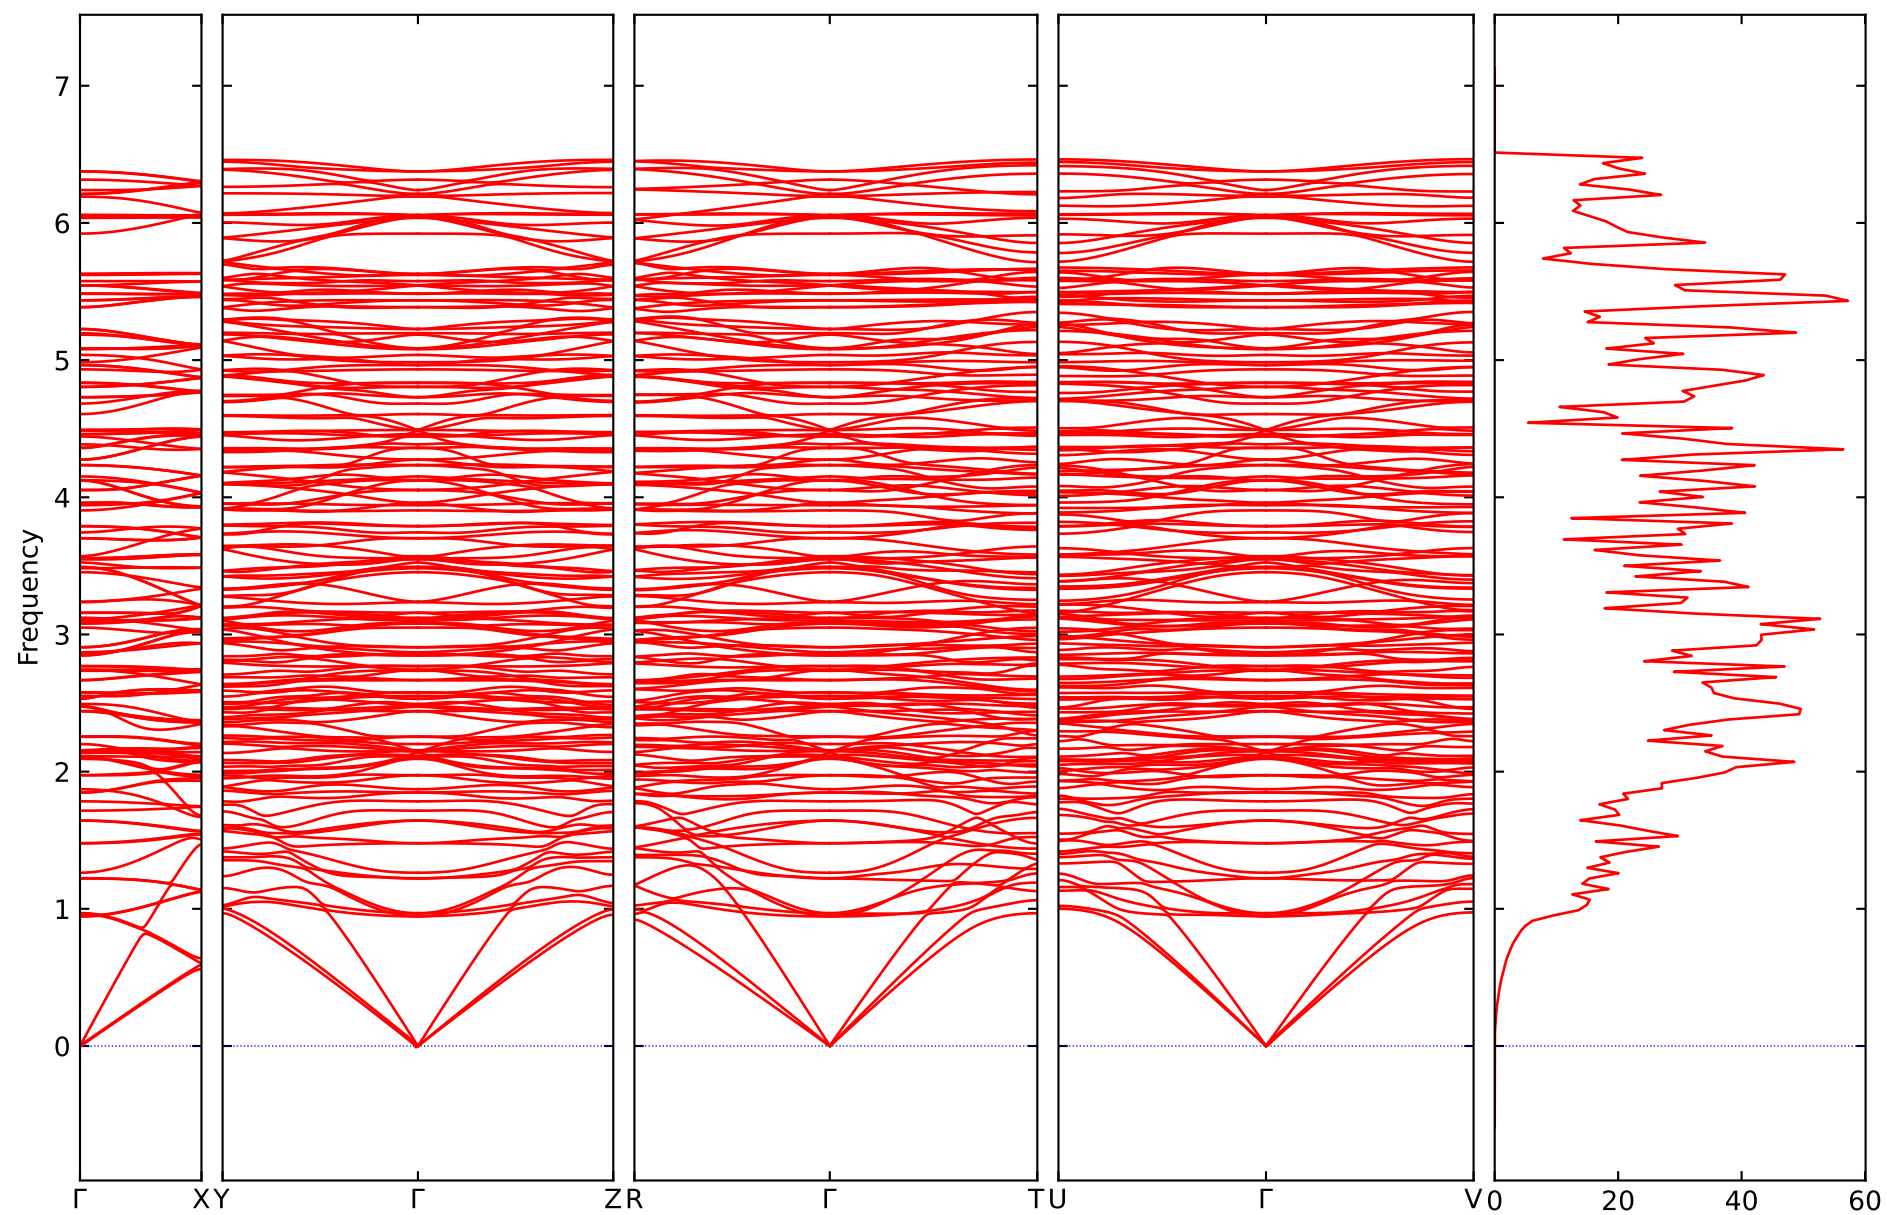

Supplement: d5ta01128k1.zip [file ph.pdf › SI/NaGe/Structures/Na9Ge4_Final/ph.pdf]

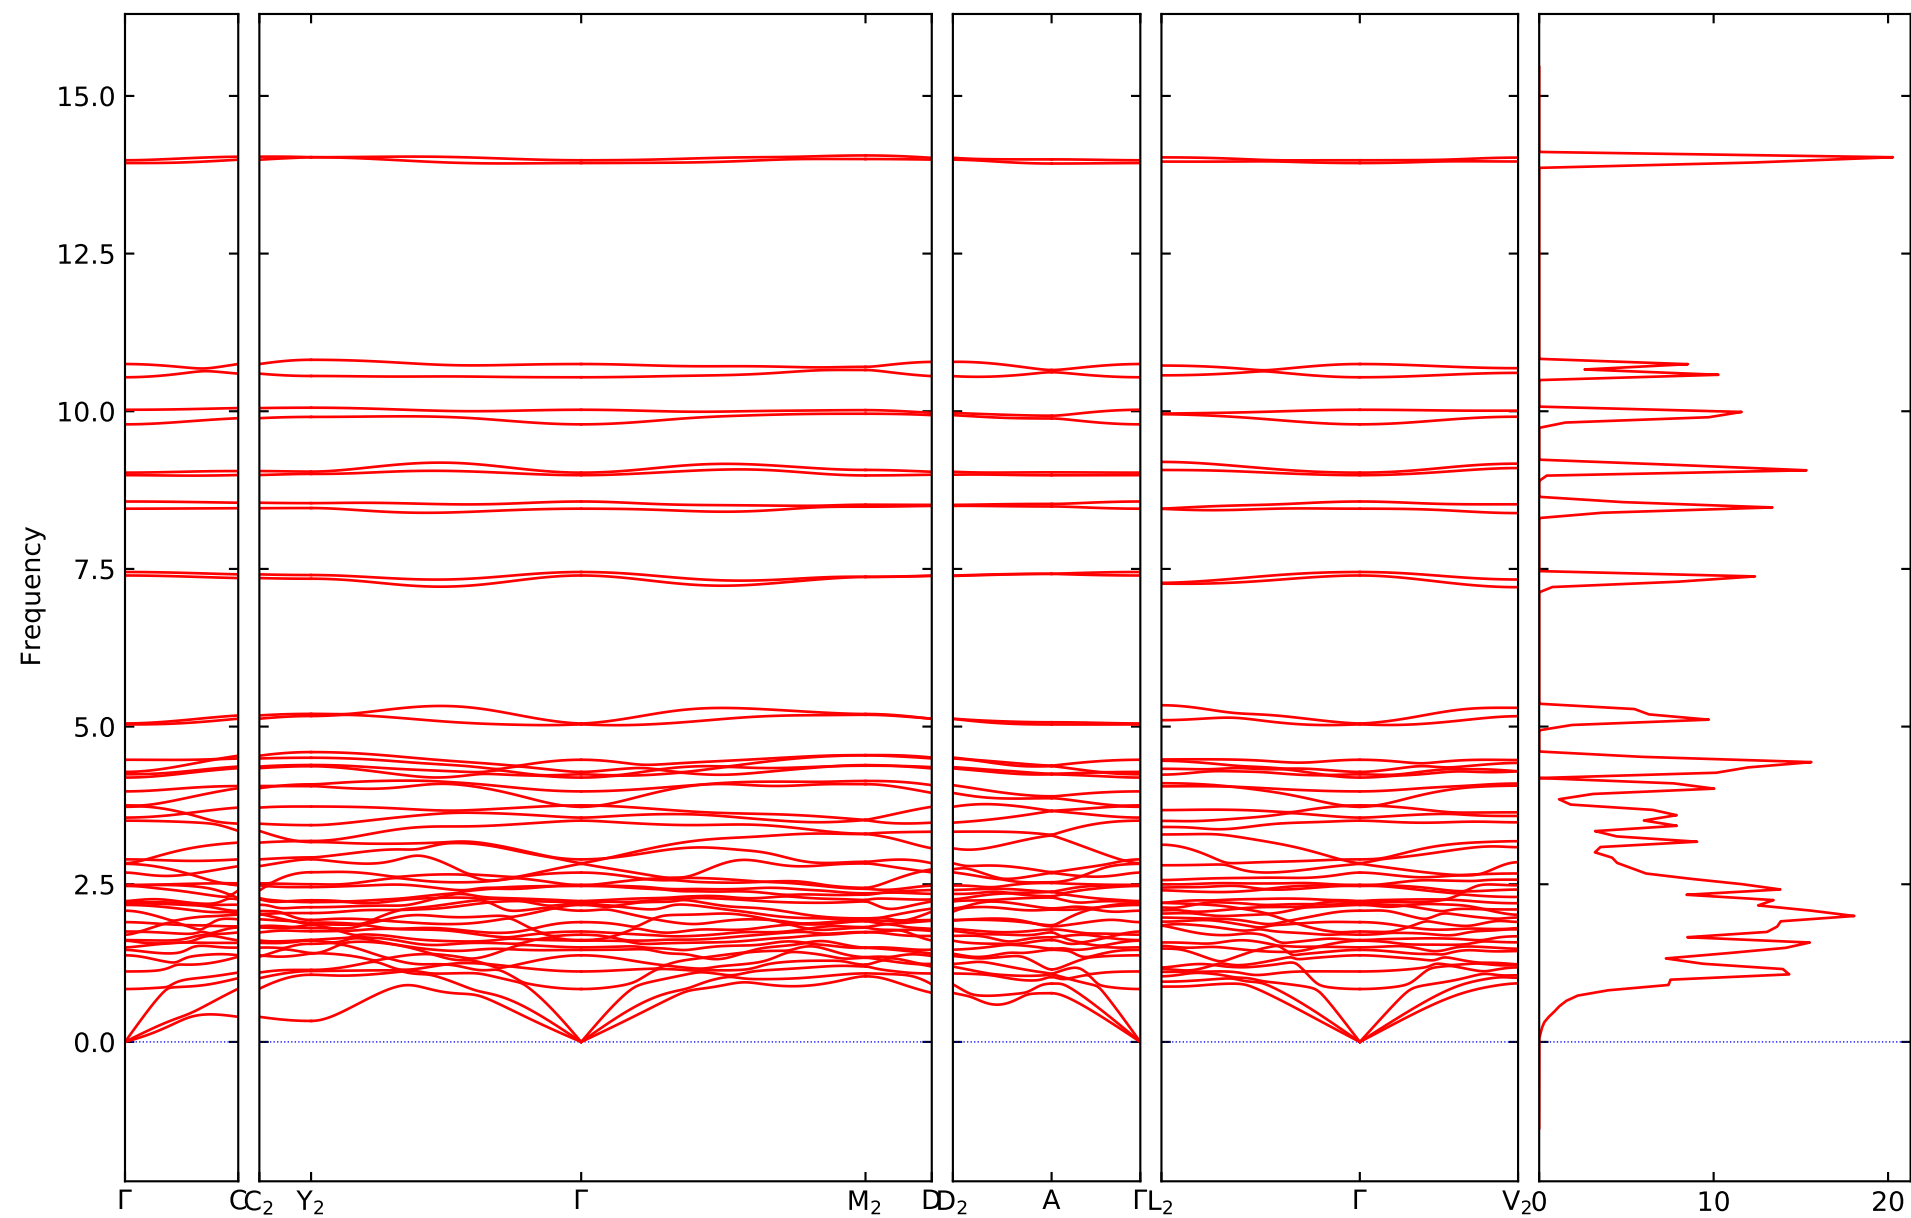

Supplement: d5ta01128k1.zip [file ph.pdf › SI/NaGe/Structures/NaGe_C2m/ph.pdf]

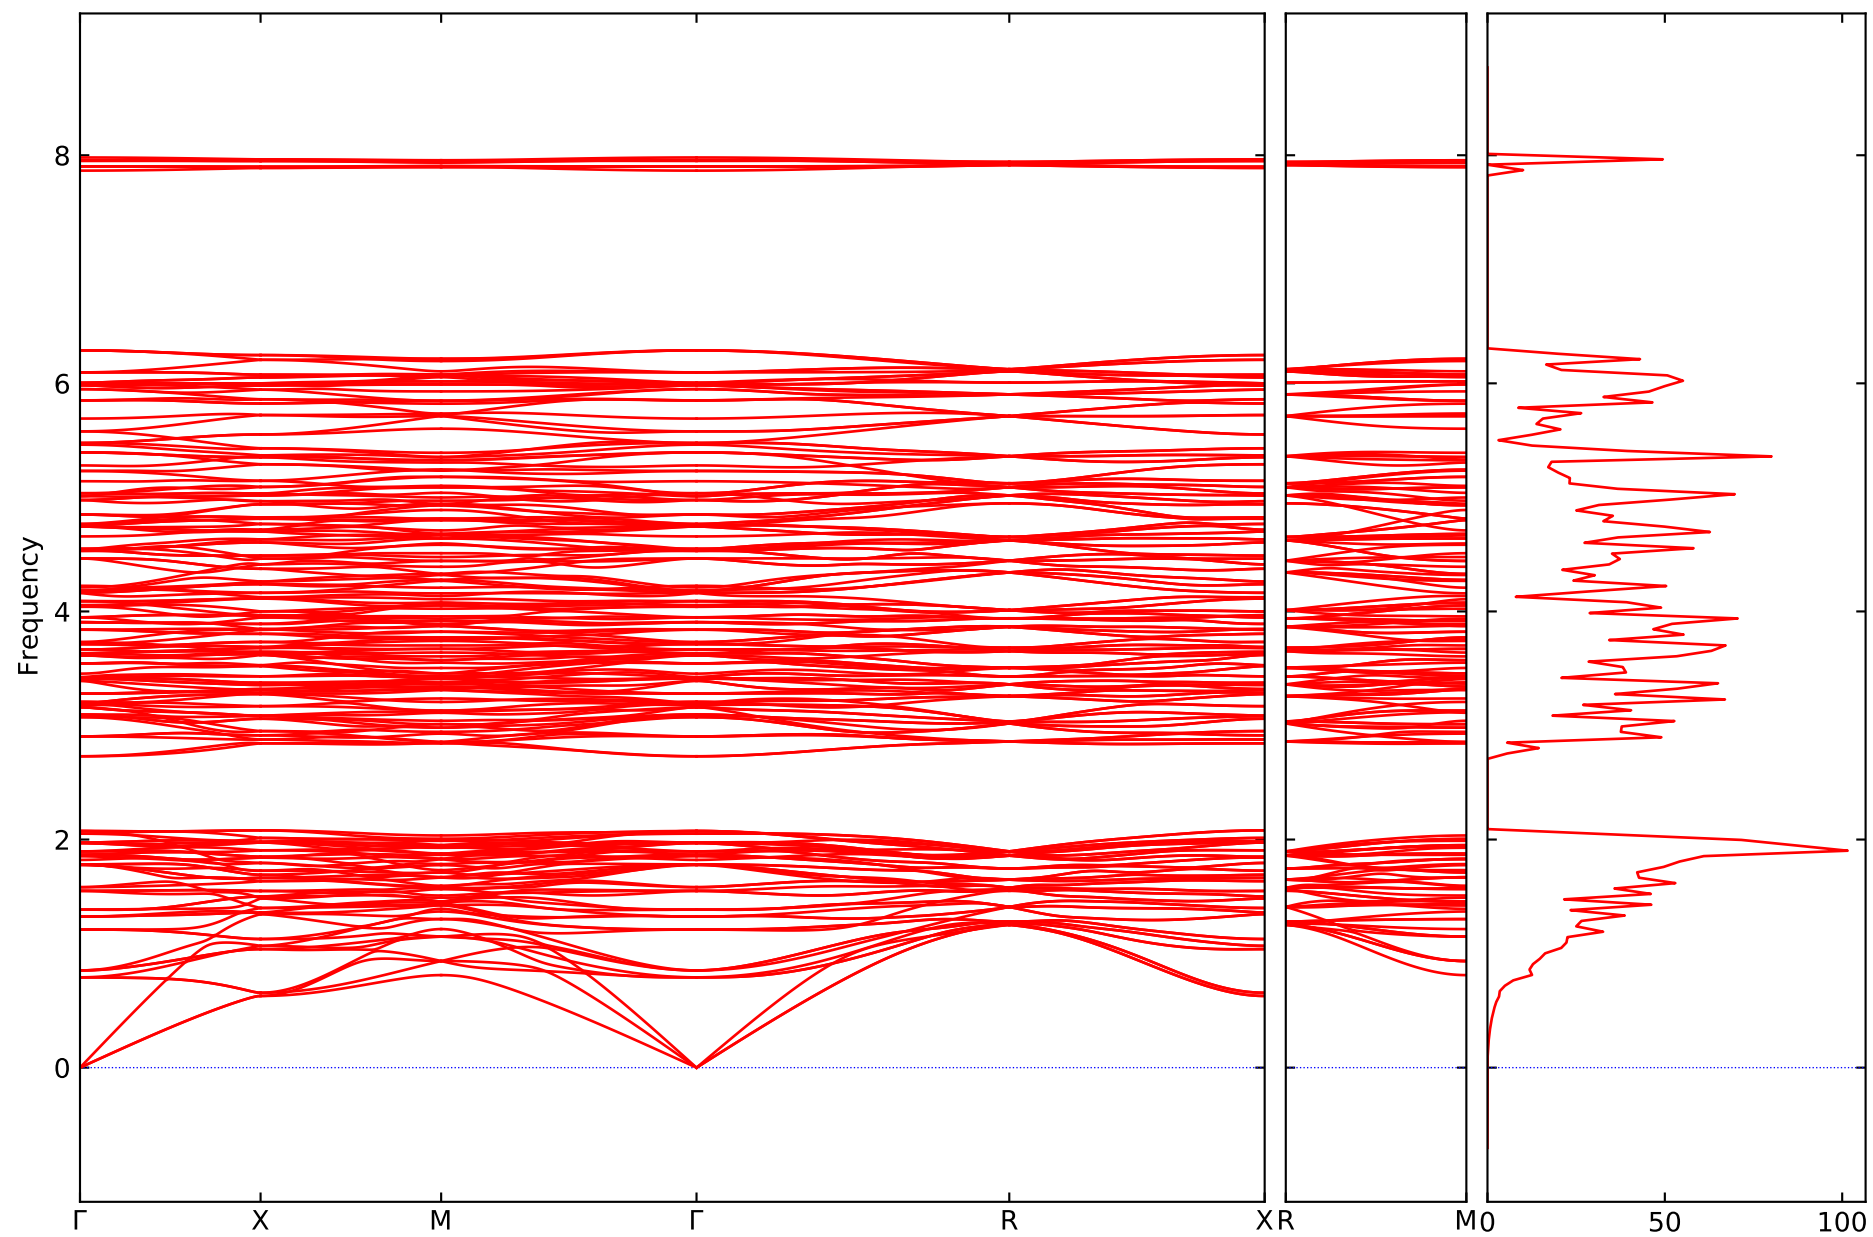

Supplement: d5ta01128k1.zip [file ph.pdf › SI/NaGe/Structures/NaGe_EA11/ph.pdf]

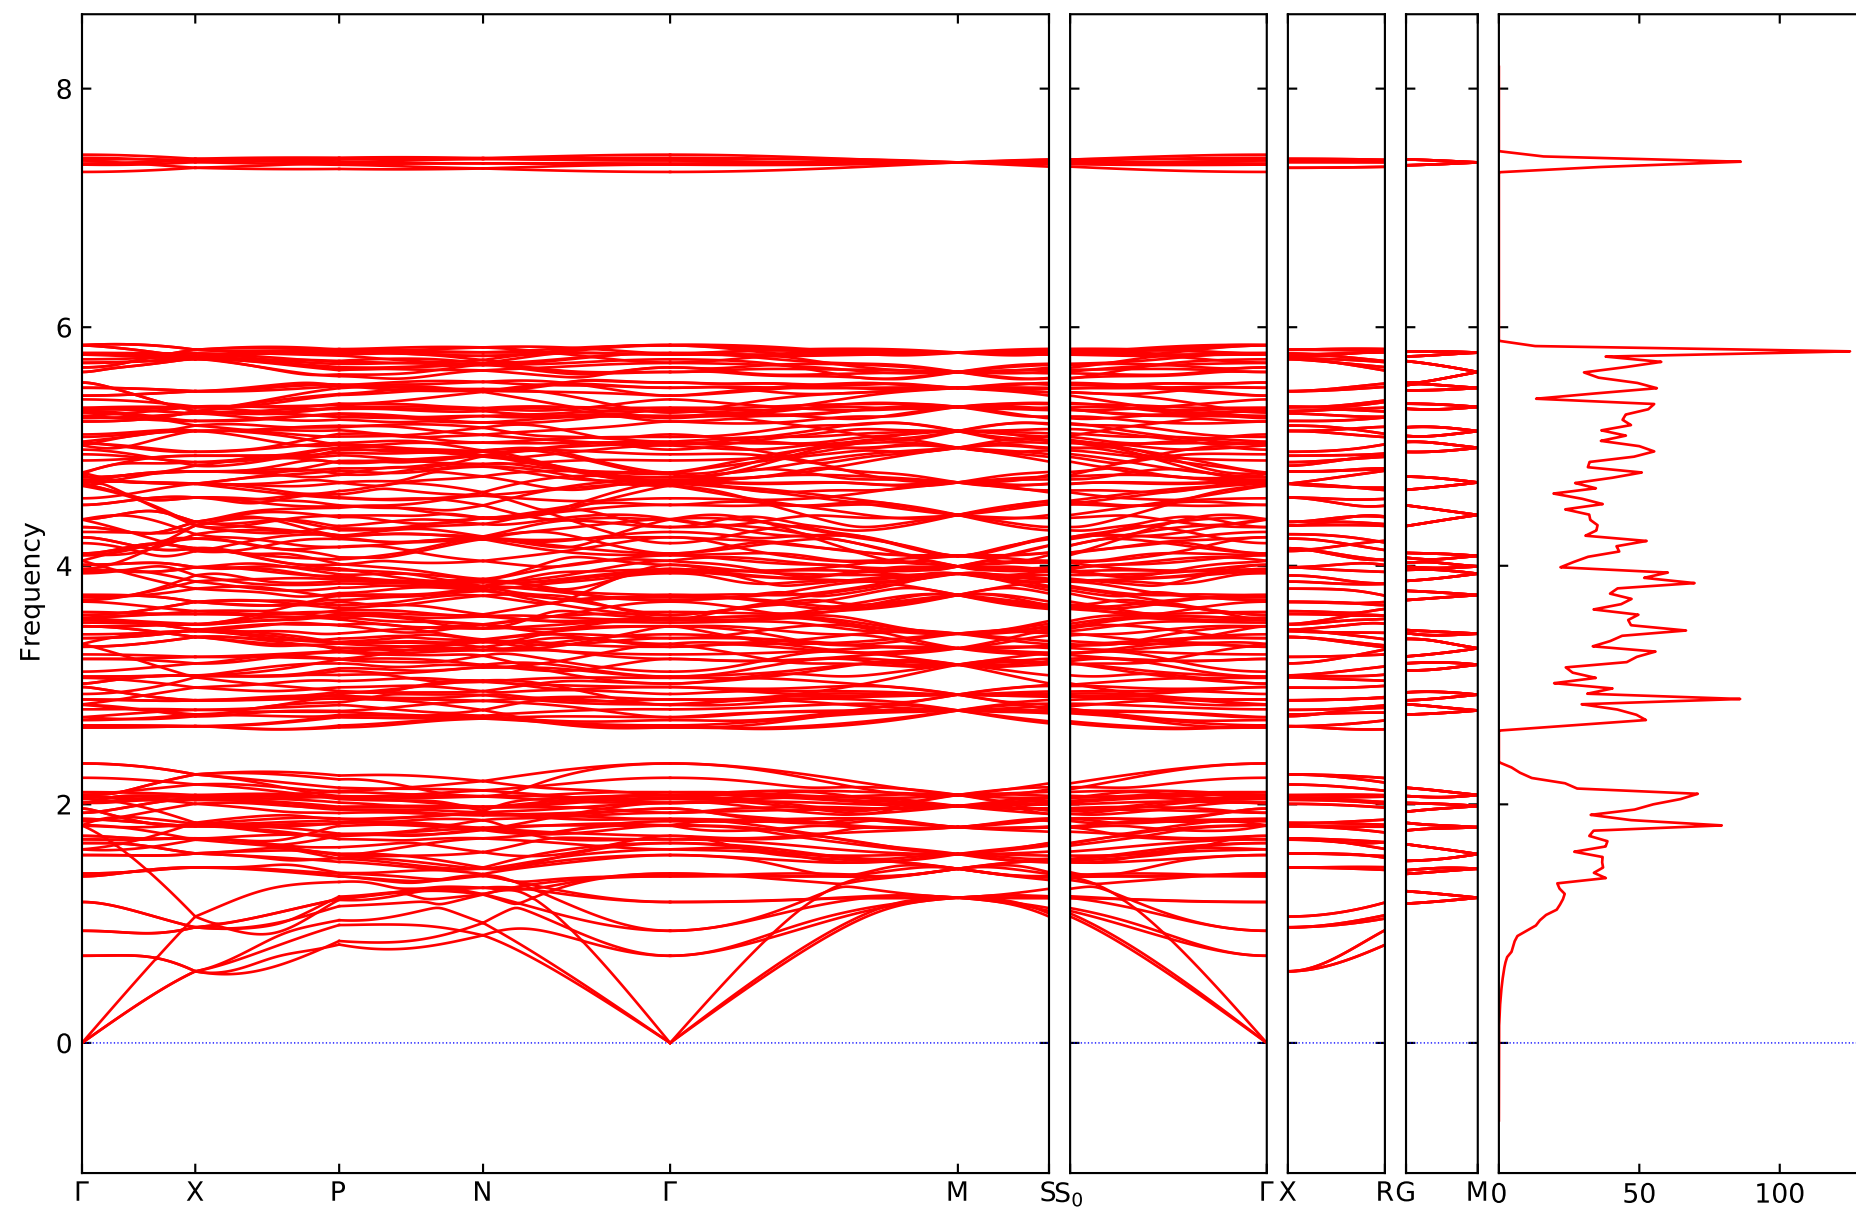

Supplement: d5ta01128k1.zip [file ph.pdf › SI/NaGe/Structures/NaGe_EA20/ph.pdf]
